# Supplementary material for: Coumarin-appended phosphorescent cyclometalated iridium(iii) complexes as mitochondria-targeted theranostic anticancer agents
Source: Royal Society of Chemistry journal article supplement (doi:10.1039/c6dt00601a), 2016-01-01
Supplement: c6dt00601a1.pdf [file c6dt00601a1.pdf]

## Electronic Supporting Information

# Coumarin-Appended Phosphorescent Cyclometalated Iridium(III) Complexes as Mitochondria-Targeted Theranostic Anticancer Agents

*Rui-Rong Ye, <sup>a</sup> Cai-Ping Tan, <sup>\*,a</sup> Liang-Nian Ji<sup>a</sup> and Zong-Wan Mao <sup>\*,a</sup>*

MOE Key Laboratory of Bioinorganic and Synthetic Chemistry, School of Chemistry and Chemical Engineering, Sun Yat-Sen University, Guangzhou, 510275, China.

\*To whom correspondence should be addressed. E-mail: cesmzw@mail.sysu.edu.cn (Z. W. Mao); E-mail: tancaip@mail.sysu.edu.cn (C. P. Tan). Fax: +86-2084112245; Tel: +86-2084113788.

### Table of Contents

|                                    |     |
|------------------------------------|-----|
| Supporting Methods.....            | S2  |
| Supporting Scheme S1–Fig. S14..... | S8  |
| Supporting Table S1–S3.....        | S18 |
| Supporting References.....         | S40 |

## **Supporting Methods**

### **Cell lines and culture conditions**

HeLa, A549, A549R, HepG2 and LO2 cells were obtained from Experimental Animal Center of Sun Yat-Sen University (Guangzhou, China). The cells were maintained in DMEM (Dulbecco's modified Eagle's medium, Gibco BRL) or RPMI 1640 (Roswell Park Memorial Institute 1640, Gibco BRL) medium containing 10% FBS (fetal bovine serum, Gibco BRL), 100 µg/mL streptomycin (Gibco BRL), and 100 U/mL penicillin (Gibco BRL). The cells were cultured in a humidified incubator at 37 °C under 5% CO<sub>2</sub>. A549R cells were cultured in a medium containing increasing concentrations of cisplatin to maintain the resistance. In each experiment, cells treated with vehicle DMSO (1%, v/v) were used as the reference group.

### **Cytotoxicity assay**

The cells were seeded in 96-well tissue culture plates (Corning) at a density of 10,000 cells per well. After incubation for 24 h, the cells were treated with various concentrations of complexes **1–3** for 44 h. Then, 20 µL MTT (5 mg/mL) was added to each well. The cells were incubated for another 4 h. At the end of the incubation period, the medium was removed and the formazan product was dissolved in 150 µL DMSO. The cell viability was evaluated by measurement of the absorbance at 595 nm (Infinite F200, Tecan, Switzerland), and complexes **1–3** have no absorption at 595 nm. Each experiment was repeated at least three times to get the mean values. For the cytotoxicity assay in the presence of the inhibitors, HeLa cells were preincubated with 50 µM z-VAD-FMK or 10 mM NAC for 1 h before the complexes were added.

### **Determination of lipophilicity**

The lipophilicity of the iridium(III) complexes, which was presented as  $\log P_{o/w}$  values, was determined according to a reported procedure.<sup>1</sup> Briefly, aqueous sodium chloride (0.9% w/v) and *n*-octanol were saturated for 1 week. Complexes **1–3** were dissolved in the aqueous phase. An equal volume of saturated *n*-octanol was added, and the solutions mixed for 24 h. The samples were then centrifuged (1500 g, 10 min). The Ir(III) content of the *n*-octanol and aqueous phases was determined by UV/Vis (280 nm).  $\log P_{o/w}$  was calculated as the logarithmic ratio of Ir(III) concentration in *n*-octanol to that in aqueous phases.

### **ICP-MS measurement**

HeLa cells were seeded in 10 cm tissue culture dishes and incubated for 24 h. The medium was removed and replaced with fresh medium containing the tested complexes **1–3** (10  $\mu$ M). After 1 h incubation, the cells were washed with PBS, trypsinized and collected. The cells were counted, and digested with HNO<sub>3</sub> (65%, 0.2 mL) at room temperature for at least 24 h. The solution was then diluted to a final volume of 10 mL with Milli-Q water. The concentration of Ir(III) was measured using the XSERIES 2 ICP-MS.

### **Colocalization assay**

HeLa and A549 cells were co-incubated with Ir(III) complexes (10  $\mu$ M) and MTDR (150 nM) or LTDR (50 nM) at 37 °C for 30 min. Cells were washed three times with PBS and visualized by confocal microscopy immediately. The wavelength for the excitation of Ir(III) complexes is 405 nm. The excitation wavelength of MTDR and LTDR is 633 nm. Emission was collected at 600  $\pm$  20 nm (**1**), 530  $\pm$  20 nm (**2**), 630  $\pm$  20 nm (**3**), 665  $\pm$  20 nm (MTDR) and 668  $\pm$  20 nm (LTDR).

### **Live cell imaging after treatment with metabolic or endocytic inhibitors**

HeLa cells were seeded in 35 mm dishes for 24 h and preincubated with CCCP (30  $\mu$ M) or chloroquine (50  $\mu$ M) for 1 h. The medium was removed and the cells were then incubated with **1**, **2** or **3** (10  $\mu$ M) for 30 min. The cells were washed three times with PBS and visualize by a confocal microscope immediately.

### **Analysis of MMP**

HeLa cells were cultured in 60 mm dishes (Corning) and treated with complexes **1–3** for 6 h. The cells were then collected and resuspended at  $1 \times 10^6$ /mL in pre-warmed PBS containing 5  $\mu$ g/mL JC-1, and incubated for 20 min at 37 °C. Subsequently, the cells were washed twice with PBS and immediately analyzed in a flow cytometer. Fluorescence was monitored by measuring both the monomer (527 nm emission; green) and the aggregate (590 nm emission; red) forms of JC-1 following excitation at 488 nm. Red and green MFI were analyzed using FlowJo 7.6 software (Tree Star, USA). 10, 000 events were acquired for each sample.

### **Real-time tracking of changes in mitochondrial morphology**

HeLa cells were treated with **1–3** (10  $\mu$ M) and incubated in a humidified incubator, which provided an atmosphere of 5% CO<sub>2</sub> and 95% air at a constant temperature of 37 °C and connected with the confocal microscope. Cell imaging was then carried out after 5 min by confocal microscopy and photographs were taken every 10 min. Excitation wavelength: 405 nm. Emission filters: 600  $\pm$  20 nm (**1**), 530  $\pm$  20 nm (**2**) and 630  $\pm$  20 nm (**3**).

### **Measurement of intracellular ROS**

Cells were treated with **1–3** at the indicated concentrations for 6 h and then incubated with 10  $\mu$ M H<sub>2</sub>DCFDA in serum-free DMEM for 15 min at 37 °C in the dark. After washed twice with serum-

free DMEM, the fluorescence intensity of cells was measured immediately by flow cytometry with excitation at 488 nm and emission at 530 nm. Green MFI were analyzed using FlowJo 7.6 software (Tree Star, USA).

### **Cell cycle analysis**

HeLa cells were cultured in 60 mm dishes (Corning) and incubated with **1–3** for 24 h. The cells were then collected and fixed in 2 mL of 70% aqueous ethanol (v/v). After overnight storage at  $-20^{\circ}\text{C}$ , cells were centrifuged (15 min at 800 g) and washed twice with PBS, and then resuspended in 500  $\mu\text{L}$  PBS containing PI (50  $\mu\text{g}/\text{mL}$ ) and DNase-free RNase (100  $\mu\text{g}/\text{mL}$ ). Data were collected by a flow cytometer and analyzed by ModFit LT 2.0 software. 10, 000 events were acquired for each sample.

### **Detection of apoptosis**

**1) Hoechst staining.** HeLa cells were seeded into 35 mm dishes (Corning) and treated with **1–3** for 24 h. The cells were then washed once with PBS and fixed with 4% paraformaldehyde at room temperature for 10 min. After that, cells were labelled with Hoechst 33342 (5  $\mu\text{g}/\text{mL}$  in PBS) for 5 min. The cells were analyzed immediately with a confocal microscope.

**2) Annexin V/PI assay.** The assay was performed according to the manufacturer's protocol. HeLa cells were cultured in 6-well plates and treated with different concentrations of **1–3** for 24 h. The cells were harvested and stained with 5  $\mu\text{L}$  annexin V and 10  $\mu\text{L}$  PI at room temperature for 10 min in the dark, and analyzed immediately by flow cytometry ( $\lambda_{\text{ex}} = 488 \text{ nm}$ ), and the absorbance at 488 nm of **1–3** can be ignored. Data were analyzed by FlowJo Software (Tree Star, USA).

**3) Caspase-3/7 activity assay.** Caspase-3/7 activity was measured using the Caspase-Glo<sup>®</sup> Assay kit (Promega, USA) according to the manufacturer's instructions. Briefly, cells were cultured in 48-

well plates and treated with different concentration of **1–3** for 6 h, and then 50 µL cell lysate was added to each well, followed by the addition of 50 µL Caspase-Glo® 3/7 reagent. The mixture was incubated at room temperature for 30 min and then the luminescence was measured using a TECAN Infinite M200 station.

### **Microarray analysis**

**1) RNA extraction and purification.** HeLa cells ( $1 \times 10^6$ ) were treated with vehicle control (1% DMSO) or **3** (2 µM) for 24 h. All samples were run in triplicate. Total RNA was extracted using TRIZOL Reagent (Life technologies, USA) following the manufacturer's instructions and checked for a RNA integrity number (RIN) to inspect RNA integrity by an Agilent Bioanalyzer 2100 (Agilent technologies, USA). Qualified total RNA was further purified by RNeasy micro kit and RNase-Free DNase Set (QIAGEN, Germany).

**2) RNA amplification and labeling.** Total RNA was amplified, labeled and purified by Affymetrix WT PLUS Reagent Kit (Affymetrix, USA)/Ovation FFPE WTA System (NuGEN, USA) and FL-Ovation™ cDNA Biotin Module V2 (NuGEN, USA) according to the manufacturer's instructions to obtain biotin labeled cDNA.

**3) Array hybridization.** Array hybridization and washing was performed using GeneChip® Hybridization, Wash and Stain Kit (Affymetrix, USA) in a Hybridization Oven 645 (Affymetrix, USA) and a Fluidics Station 450 (Affymetrix, USA) following the manufacturer's instructions.

**4) Data acquisition.** Arrays were scanned by Affymetrix GeneChip® Scanner 3000 (Affymetrix, USA). Command Console Software (Affymetrix, USA) was used to control the scanner and summarize probe cell intensity data (CEL file generation) with default settings. Then the raw data were subjected to normalization, background correction and summarization using Expression

Console (Affymetrix, USA) software with the standard Robust Multi-array Average (RMA) algorithm. Differentially expressed genes were then identified through fold change. Gene Ontology (GO) analysis and Kyoto Encyclopedia of Genes and Genomes (KEGG) analysis using the online tool FunNet were applied to determine the roles of these differentially expressed mRNAs played in these GO terms or pathways. For Connectivity Map (<http://www.broadinstitute.org/cmap>), regulated genes with more than twofold change were selected and queried for analysis.

### **Statistical analysis**

All biological experiments were performed at least twice with triplicates in each experiment. Representative results were depicted in this report and data were presented as means  $\pm$  SD.

## Supporting Figures

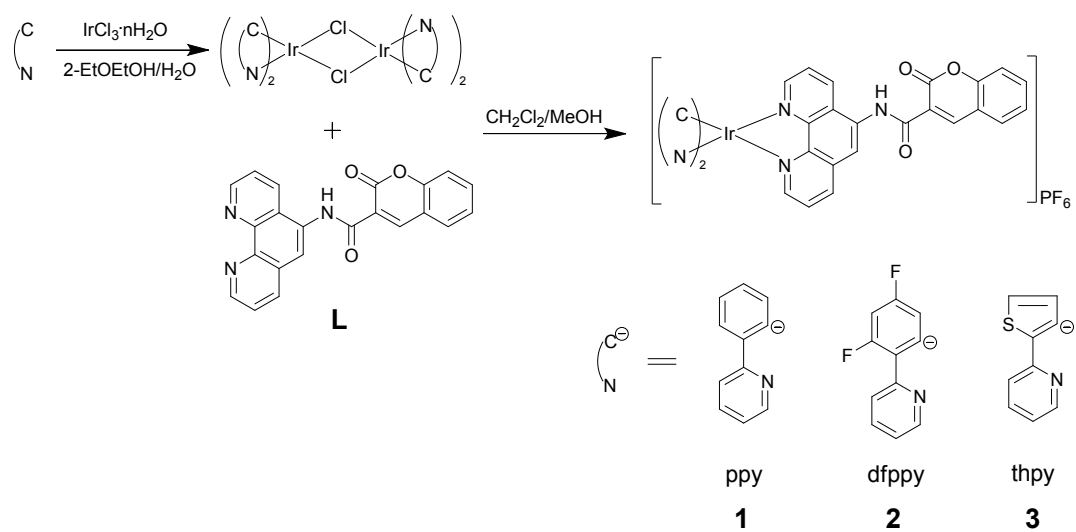

**Scheme S1** Synthetic routes of complexes **1–3**.



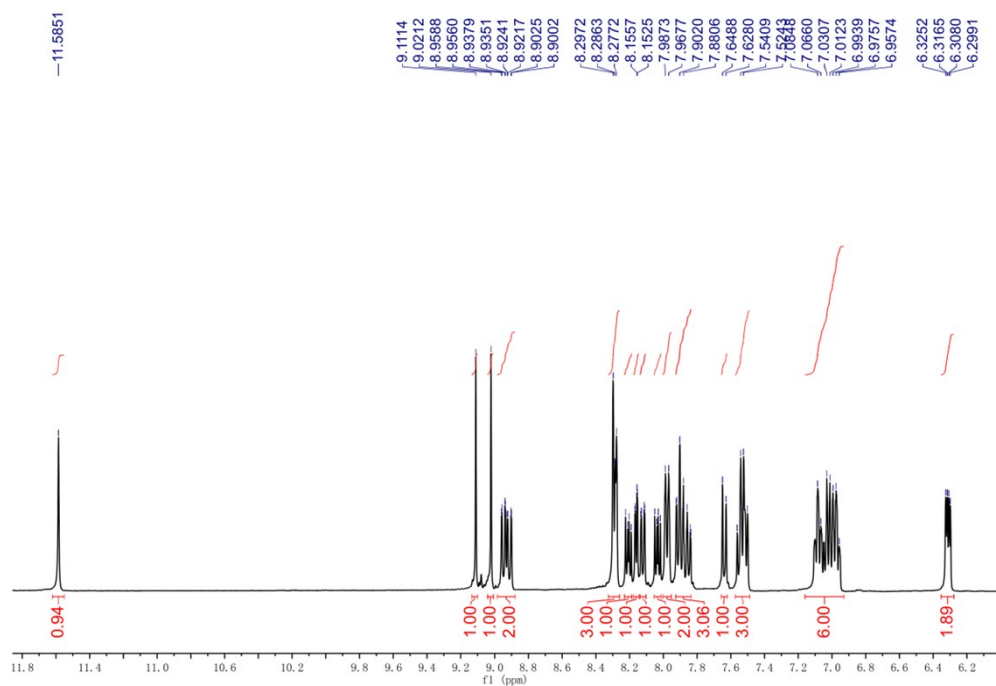

**Fig. S1**  $^1\text{H}$  NMR spectrum of **1**.

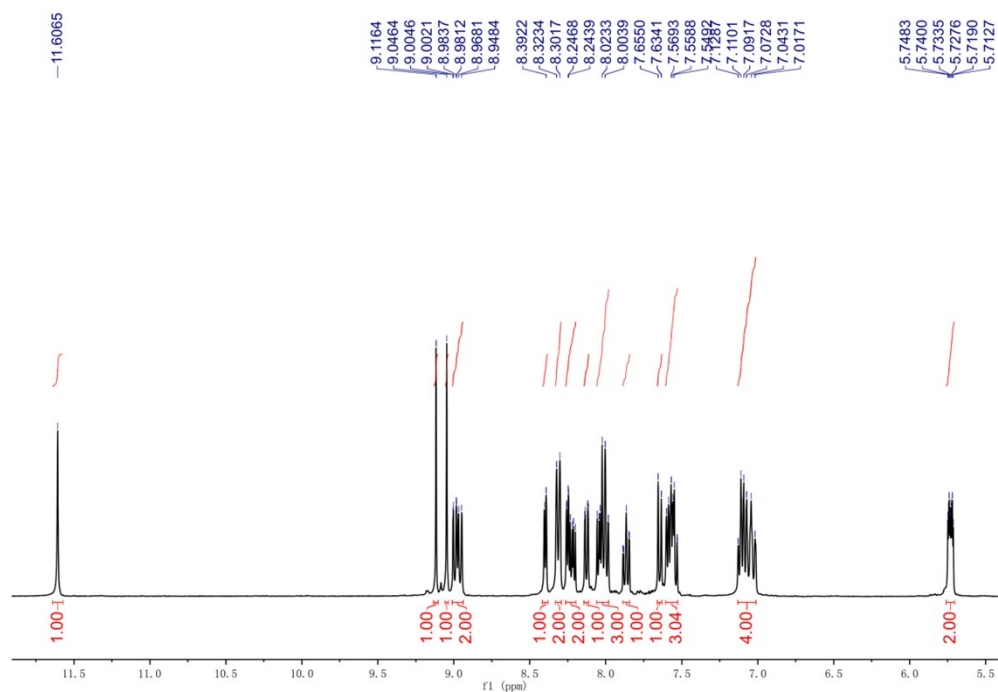

**Fig. S2**  $^1\text{H}$  NMR spectrum of **2**.

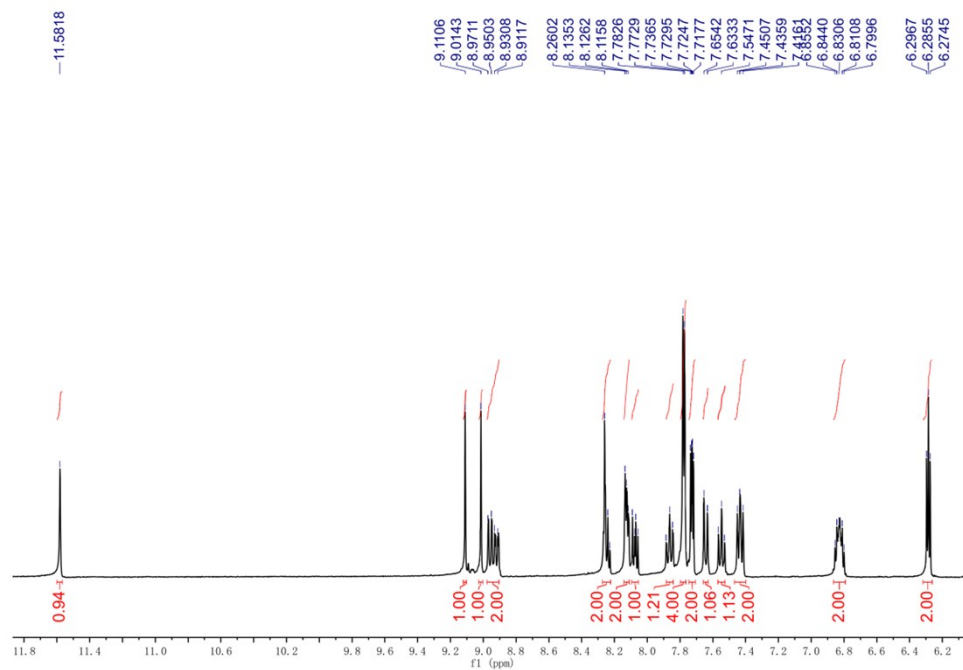

**Fig. S3** <sup>1</sup>H NMR spectrum of **3**.

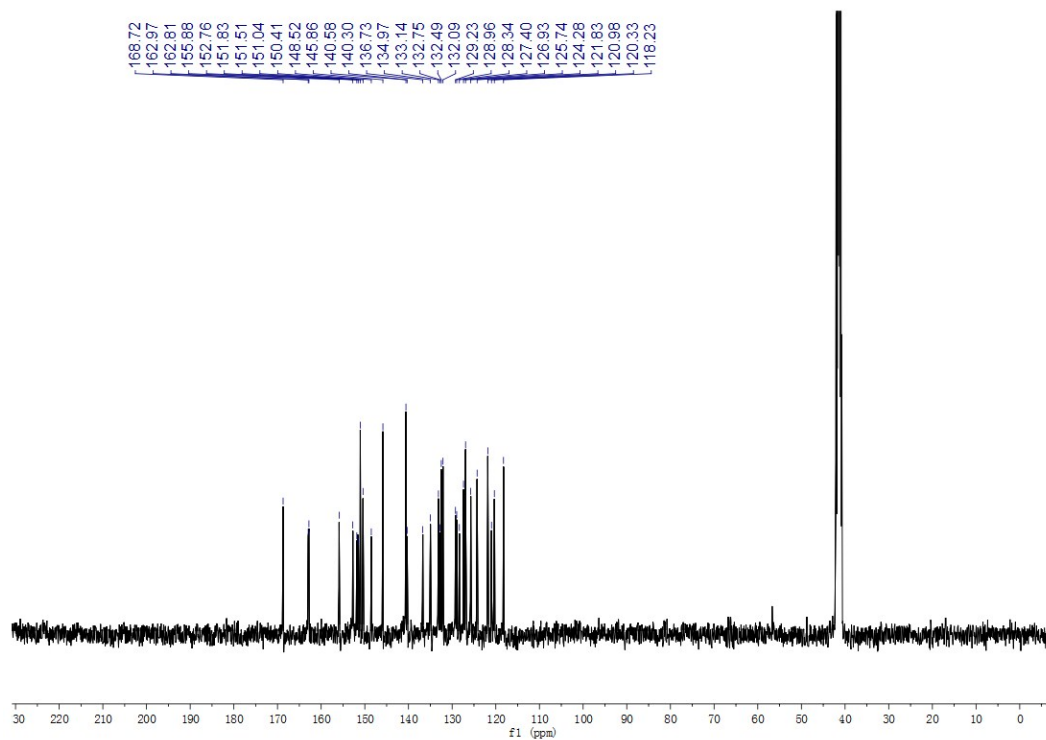

**Fig. S4** <sup>13</sup>C NMR spectrum of **1**.

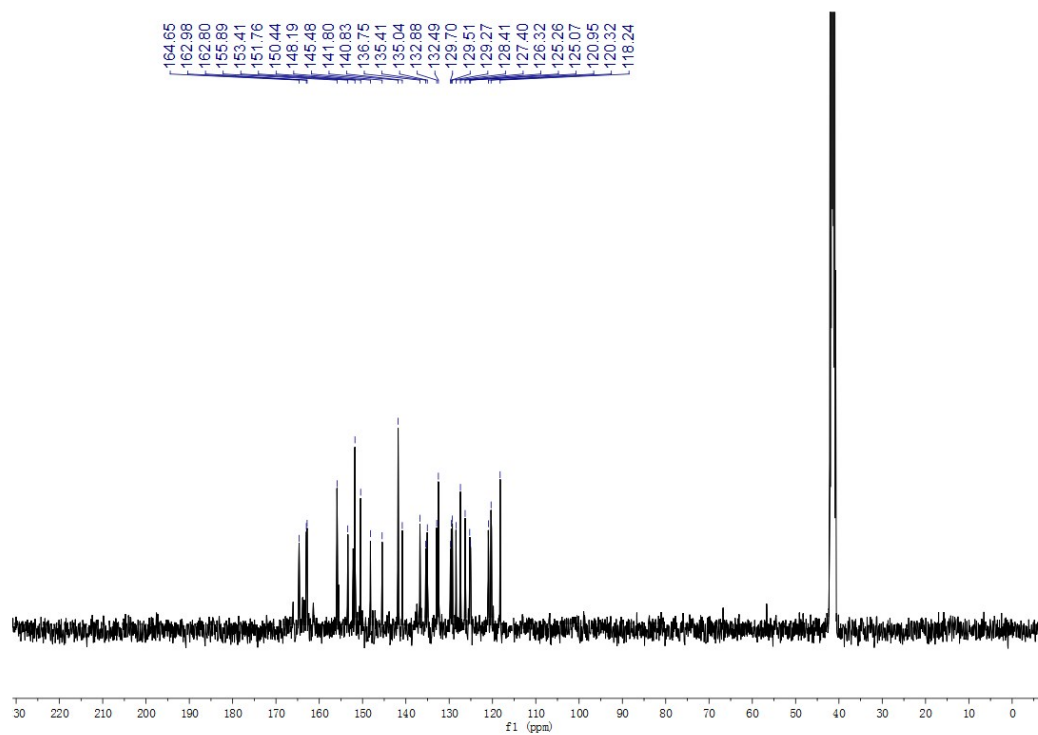

**Fig. S5**  $^{13}\text{C}$  NMR spectrum of **2**.

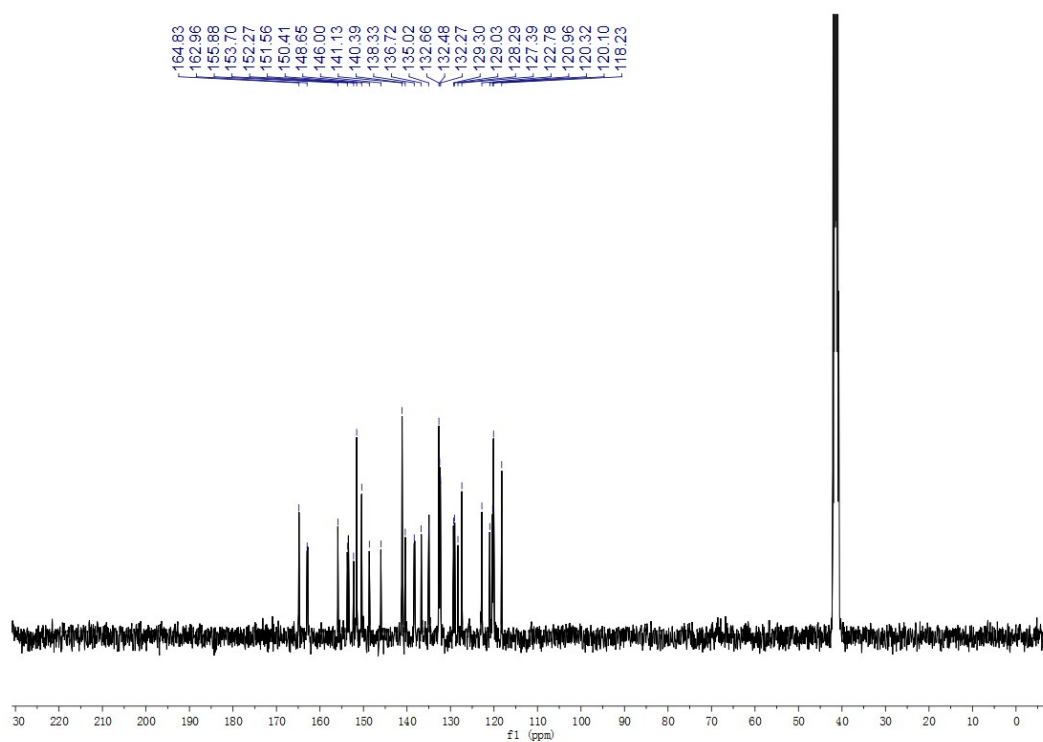

**Fig. S6**  $^{13}\text{C}$  NMR spectrum of **3**.

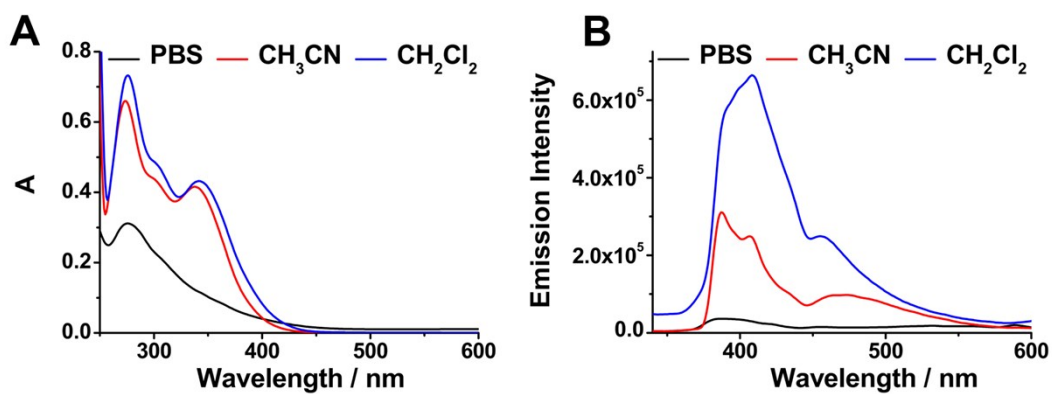

**Fig. S7** (A) UV/Vis spectra of **L** ( $2 \times 10^{-5}$  M) measured in degassed PBS, CH<sub>3</sub>CN and CH<sub>2</sub>Cl<sub>2</sub> at 298 K. (B) Emission spectra of **L** ( $2 \times 10^{-5}$  M) measured in degassed PBS, CH<sub>3</sub>CN and CH<sub>2</sub>Cl<sub>2</sub> at 298 K ( $\lambda_{\text{ex}} = 275$  nm).

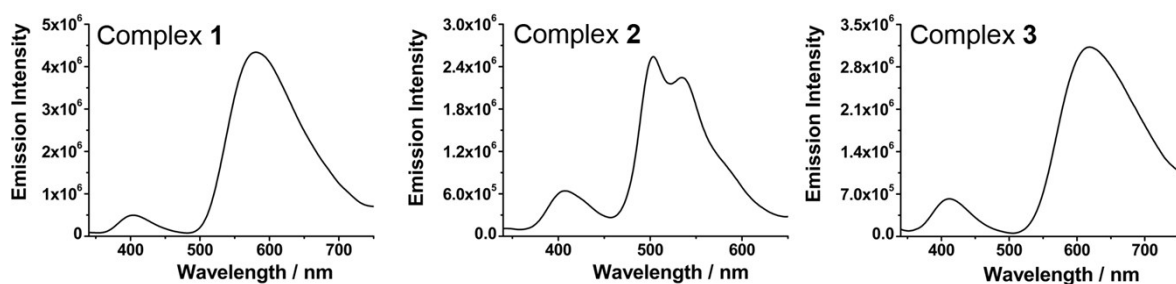

**Fig. S8** Emission spectra of complexes **1–3** ( $2 \times 10^{-5}$  M) measured in degassed CH<sub>2</sub>Cl<sub>2</sub> ( $\lambda_{\text{ex}} = 300$  nm).

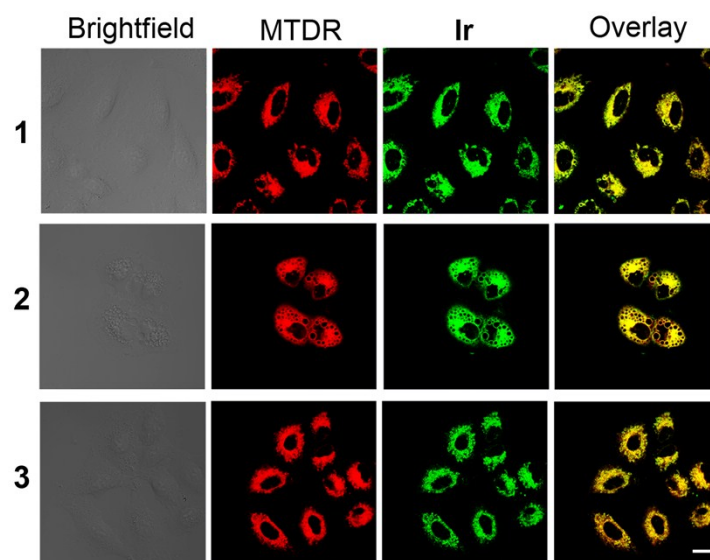

**Fig. S9** Confocal microscopic images of A549 cells colabeled with **1–3** (10  $\mu$ M, 30 min) and MTDR (150 nM, 30 min). **1–3** were excited at 405 nm and MTDR was excited at 633 nm. The phosphorescence/fluorescence was collected at  $600 \pm 20$  nm,  $530 \pm 20$  nm,  $630 \pm 20$  nm and  $665 \pm 20$  nm for **1**, **2**, **3** and MTDR, respectively. Scale bar: 20  $\mu$ m.

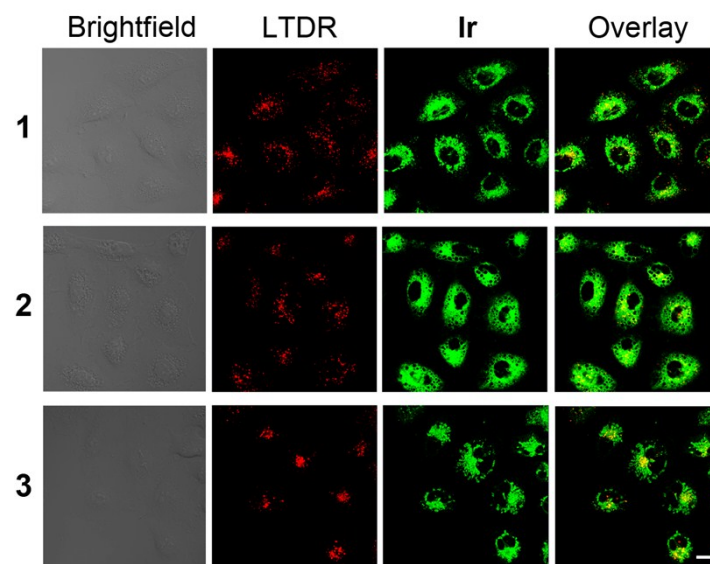

**Fig. S10** Confocal microscopic images of A549 cells colabeled with **1–3** (10  $\mu$ M, 30 min) and LTDR (50 nM, 30 min). **1–3** were excited at 405 nm and LTDR was excited at 633 nm. The phosphorescence/fluorescence was collected at  $600 \pm 20$  nm,  $530 \pm 20$  nm,  $630 \pm 20$  nm and  $668 \pm 20$  nm for **1**, **2**, **3** and LTDR, respectively. Scale bar: 20  $\mu$ m.

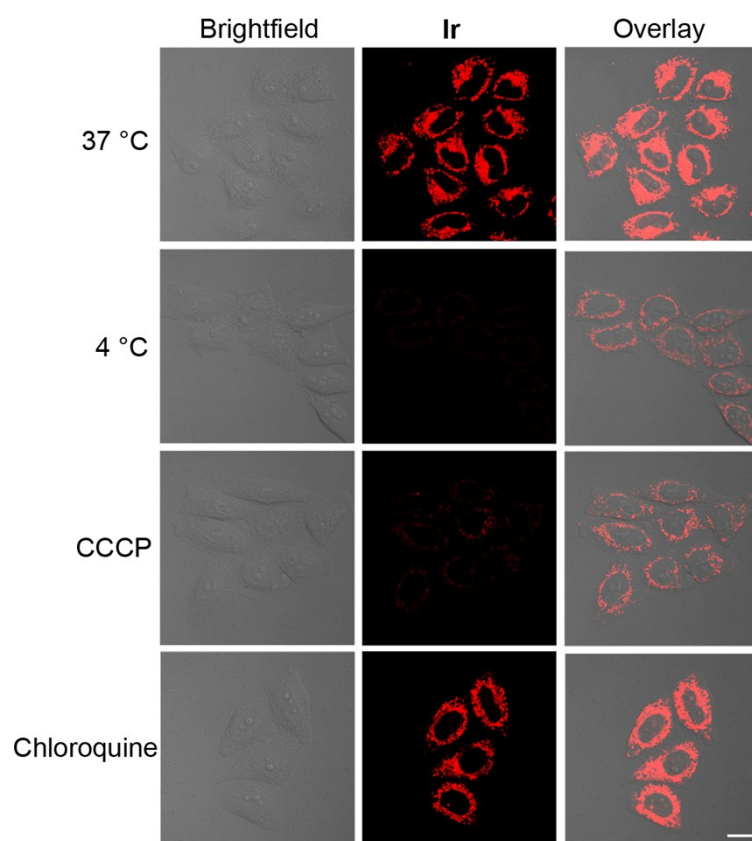

**Fig. S11** Effect of incubation temperature (37 °C and 4 °C), metabolic inhibitor (CCCP, 30  $\mu$ M) and chloroquine (50  $\mu$ M) on cellular uptake of **1** (10  $\mu$ M, 30 min) measured by confocal microscopy. Complex **1** was excited at 405 nm and emission was collected at  $600 \pm 20$  nm. Scale bar: 20  $\mu$ m.

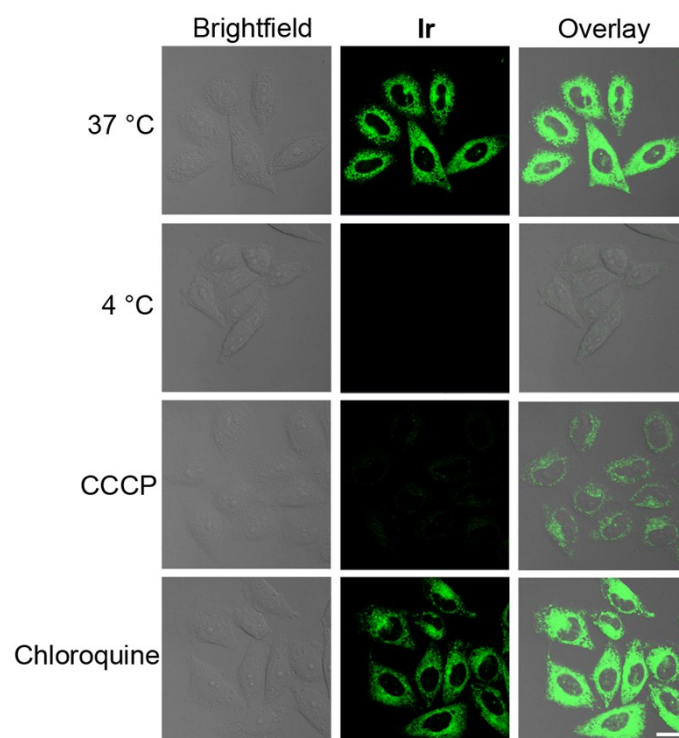

**Fig. S12** Effect of incubation temperature (37 °C and 4 °C), metabolic inhibitor (CCCP, 30  $\mu$ M) and chloroquine (50  $\mu$ M) on cellular uptake of **2** (10  $\mu$ M, 30 min) measured by confocal microscopy. Complex **2** was excited at 405 nm and emission was collected at  $530 \pm 20$  nm. Scale bar: 20  $\mu$ m.

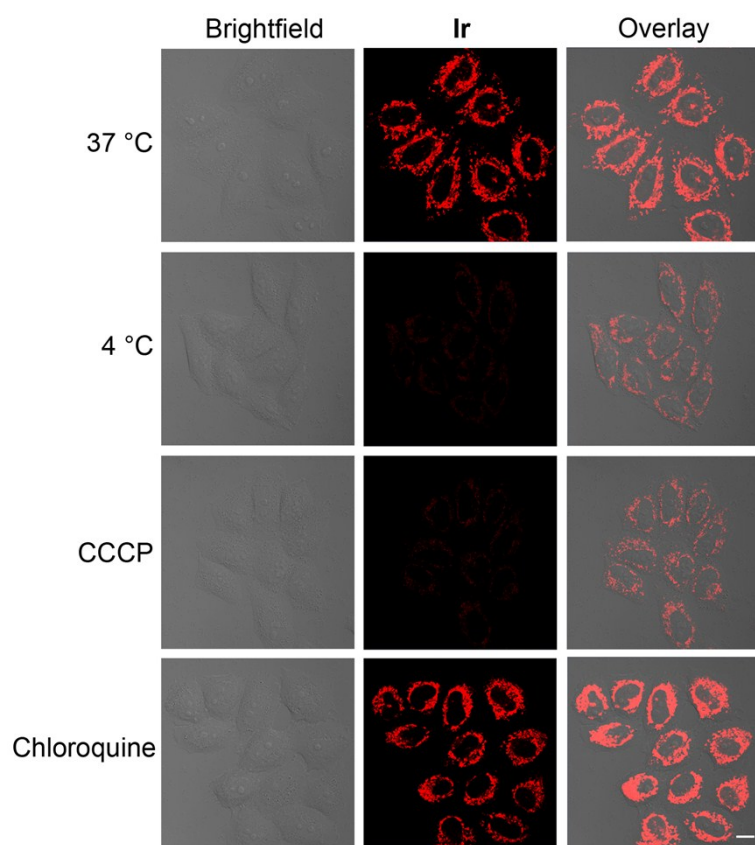

**Fig. S13** Effect of incubation temperature (37 °C and 4 °C), metabolic inhibitor (CCCP, 30  $\mu$ M) and chloroquine (50  $\mu$ M) on cellular uptake of **3** (10  $\mu$ M, 30 min) measured by confocal microscopy. Complex **3** was excited at 405 nm and emission was collected at  $630 \pm 20$  nm. Scale bar: 20  $\mu$ m.



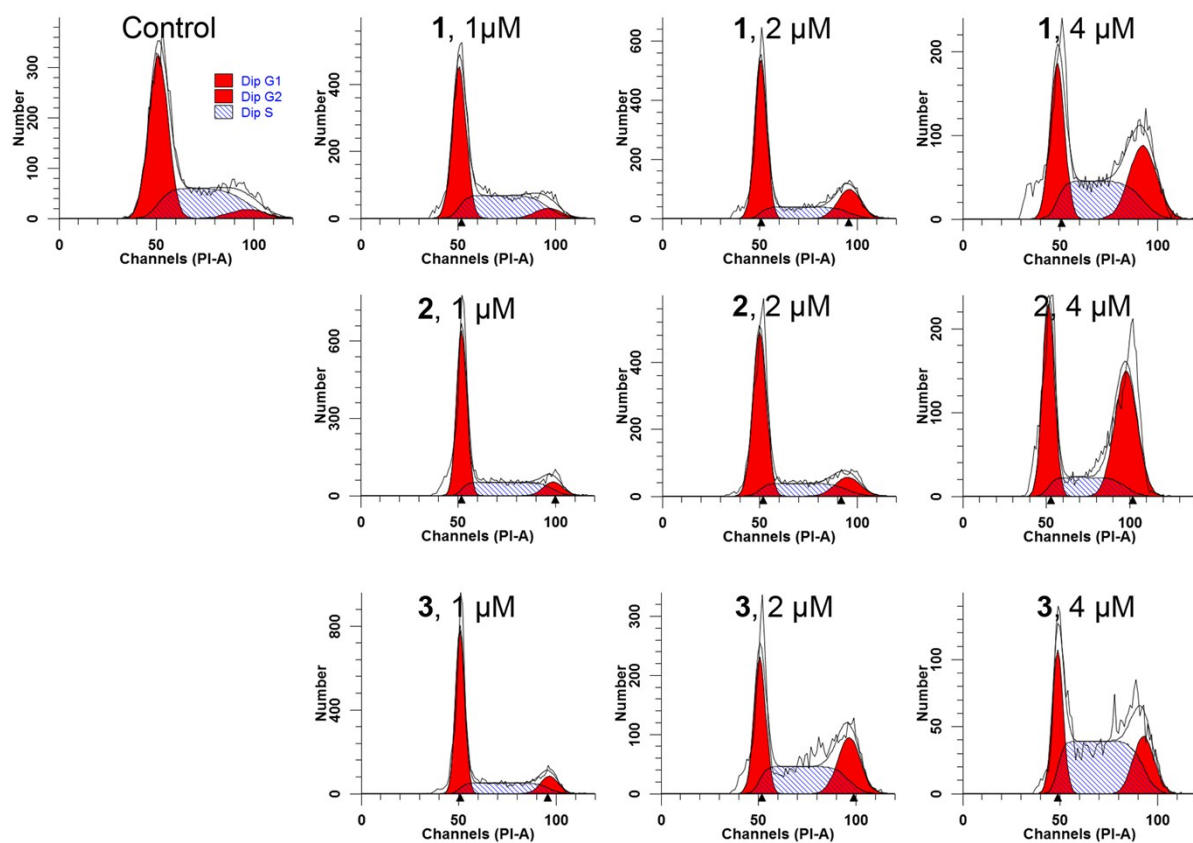

**Fig. S14** Effect of 1–3 on the distribution of HeLa cells in cell cycle populations at different concentrations for 24 h treatment.

**Table S1** Photophysical data of **1–3** in degassed medium<sup>a</sup>

| Compound | Medium                          | $\lambda_{\text{abs, max}}$<br>(nm) | $\lambda_{\text{em, max}}$<br>(nm) | $\Phi_{\text{em}}^{\text{b}}$ | $\tau_{\text{av}}^{\text{c}}$<br>(ns) |
|----------|---------------------------------|-------------------------------------|------------------------------------|-------------------------------|---------------------------------------|
| <b>1</b> | PBS                             | 346                                 | 609                                | 0.0020                        | 125.50                                |
|          | CH <sub>3</sub> CN              | 339                                 | 605                                | 0.030                         | 187.58                                |
|          | CH <sub>2</sub> Cl <sub>2</sub> | 341                                 | 588                                | 0.090                         | 206.66                                |
| <b>2</b> | PBS                             | 353                                 | 550                                | 0.0021                        | 492.89                                |
|          | CH <sub>3</sub> CN              | 345                                 | 533                                | 0.023                         | 516.48                                |
|          | CH <sub>2</sub> Cl <sub>2</sub> | 350                                 | 509                                | 0.052                         | 870.60                                |
| <b>3</b> | PBS                             | 405                                 | 646                                | 0.0012                        | 119.99                                |
|          | CH <sub>3</sub> CN              | 394                                 | 642                                | 0.0094                        | 104.82                                |
|          | CH <sub>2</sub> Cl <sub>2</sub> | 401                                 | 619                                | 0.063                         | 147.99                                |

<sup>a</sup> Samples were  $2 \times 10^{-5}$  M in concentration. <sup>b</sup> Solutions of [Ru(bpy)<sub>3</sub>](PF<sub>6</sub>)<sub>2</sub> were used as the standard, PBS ( $\Phi_{\text{em}} = 0.042$ ),<sup>2</sup> CH<sub>3</sub>CN ( $\Phi_{\text{em}} = 0.062$ )<sup>3</sup> and CH<sub>2</sub>Cl<sub>2</sub> ( $\Phi_{\text{em}} = 0.059$ )<sup>4</sup>. <sup>c</sup> Decay curves of compounds were recorded by an Edinburgh FLS 920 Spectrometer. All curves were fitted into a two exponential formula  $F(t) = A + B_1 \exp(-t/\tau_1) + B_2 \exp(-t/\tau_2) + B_3 \exp(-t/\tau_3)$ ;  $\tau_{\text{av}} = \frac{B_1\tau_1^2 + B_2\tau_2^2 + B_3\tau_3^2}{B_1\tau_1 + B_2\tau_2 + B_3\tau_3}$

**Table S2** Effects of **1–3** on the distribution of HeLa cells in cell cycle populations after 24 h of treatment<sup>a</sup>

| Compound        | G0/G1      | S          | G2/M       |
|-----------------|------------|------------|------------|
| Control         | 56.0 ± 4.3 | 38.2 ± 2.4 | 5.8 ± 0.3  |
| <b>1</b> , 1 μM | 52.9 ± 3.8 | 40.3 ± 4.0 | 6.8 ± 0.5  |
| <b>1</b> , 2 μM | 56.6 ± 5.0 | 19.6 ± 1.2 | 23.8 ± 1.8 |
| <b>1</b> , 4 μM | 32.8 ± 2.1 | 37.8 ± 2.2 | 29.4 ± 1.9 |
| <b>2</b> , 1 μM | 58.0 ± 4.5 | 32.9 ± 2.6 | 9.1 ± 0.8  |
| <b>2</b> , 2 μM | 61.7 ± 5.8 | 24.8 ± 1.3 | 13.5 ± 1.1 |
| <b>2</b> , 4 μM | 36.6 ± 2.9 | 18.5 ± 1.2 | 44.9 ± 3.6 |
| <b>3</b> , 1 μM | 59.3 ± 5.8 | 28.8 ± 2.0 | 11.9 ± 1.0 |
| <b>3</b> , 2 μM | 40.7 ± 3.2 | 40.4 ± 3.9 | 18.9 ± 1.4 |
| <b>3</b> , 4 μM | 17.6 ± 1.8 | 56.3 ± 4.8 | 26.1 ± 2.2 |

<sup>a</sup> Data shown are mean values ± SD of three independent experiments for each treatment.

**Table S3** List of differentially regulated genes induced by 3

| <b>Up-regulated</b>      |             |              |                                                                                             |
|--------------------------|-------------|--------------|---------------------------------------------------------------------------------------------|
| Probe Set ID             | Fold change | Gene Symbol  | Gene Description                                                                            |
| TC19000356.hg.1          | 53.67       | GDF15        | growth differentiation factor 15                                                            |
| TC01003624.hg.1          | 27.90       | FAM129A      | family with sequence similarity 129, member A                                               |
| TC10000062.hg.1          | 18.72       | LOC100507127 | uncharacterized LOC100507127                                                                |
| TC05000218.hg.1          | 16.13       | ITGA2        | integrin, alpha 2 (CD49B, alpha 2 subunit of VLA-2 receptor)                                |
| TC05000701.hg.1          | 13.92       | EGR1         | early growth response 1                                                                     |
| TC04001570.hg.1          | 13.44       | SLC7A11      | solute carrier family 7 (anionic amino acid transporter light chain, xc- system), member 11 |
| TC01002166.hg.1          | 11.86       | ERRFI1       | ERBB receptor feedback inhibitor 1                                                          |
| TC06001754.hg.1          | 10.27       | GTPBP2       | GTP binding protein 2                                                                       |
| TC17000396.hg.1          | 9.52        | SLFN5        | schlafen family member 5                                                                    |
| TC01001348.hg.1          | 8.62        | IFI16        | interferon, gamma-inducible protein 16                                                      |
| TC12001625.hg.1          | 7.91        | DDIT3        | DNA-damage-inducible transcript 3                                                           |
| TC15000300.hg.1          | 7.87        | CHAC1        | ChaC, cation transport regulator homolog 1 (E. coli)                                        |
| TC02004994.hg.1          | 7.50        | IL1RL1       | interleukin 1 receptor-like 1                                                               |
| TC06001089.hg.1          | 7.02        | ULBP1        | UL16 binding protein 1                                                                      |
| TC05001590.hg.1          | 6.88        | ARRDC3       | arrestin domain containing 3                                                                |
| TC10000801.hg.1          | 6.55        | DUSP5        | dual specificity phosphatase 5                                                              |
| TC0X000112.hg.1          | 6.44        | SAT1         | spermidine/spermine N1-acetyltransferase 1                                                  |
| TC01000745.hg.1          | 6.34        | GADD45A      | growth arrest and DNA-damage-inducible, alpha                                               |
| TC6_qbl_hap6000133.hg.1  | 6.30        | IER3         | immediate early response 3                                                                  |
| TC01000377.hg.1          | 6.19        | SESN2        | sestrin 2                                                                                   |
| TC10001641.hg.1          | 5.87        | ITPRIP       | inositol 1,4,5-trisphosphate receptor interacting protein                                   |
| TC6_cox_hap2000143.hg.1  | 5.86        | IER3         | immediate early response 3                                                                  |
| TC6_dbb_hap3000132.hg.1  | 5.86        | IER3         | immediate early response 3                                                                  |
| TC6_mann_hap4000121.hg.1 | 5.86        | IER3         | immediate early response 3                                                                  |
| TC6_ssto_hap7000123.hg.1 | 5.86        | IER3         | immediate early response 3                                                                  |
| TC01001364.hg.1          | 5.66        | PEA15        | phosphoprotein enriched in astrocytes 15                                                    |
| TC02000705.hg.1          | 5.56        | ZC3H6        | zinc finger CCCH-type containing 6                                                          |
| TC18000413.hg.1          | 5.55        | NPC1         | Niemann-Pick disease, type C1                                                               |
| TC06001510.hg.1          | 5.55        | IER3         | immediate early response 3                                                                  |
| TC19001593.hg.1          | 5.47        | PLAUR        | plasminogen activator, urokinase receptor                                                   |
| TC11001793.hg.1          | 5.43        | SLC43A1      | solute carrier family 43, member 1                                                          |
| TC13000193.hg.1          | 5.42        | FNDC3A       | fibronectin type III domain containing 3A                                                   |
| TC12000414.hg.1          | 5.38        | NR4A1        | nuclear receptor subfamily 4, group A, member 1                                             |
| TC07001917.hg.1          | 5.37        | JHDM1D       | jumonji C domain containing histone demethylase 1 homolog D (S. cerevisiae)                 |
| TC19000711.hg.1          | 5.29        | PPP1R15A     | protein phosphatase 1, regulatory subunit 15A                                               |
| TC12000793.hg.1          | 5.22        | DRAM1        | DNA-damage regulated autophagy modulator 1                                                  |
| TC03000015.hg.1          | 5.17        | BHLHE40      | basic helix-loop-helix family, member e40                                                   |
| TC18000213.hg.1          | 5.11        | PMAIP1       | phorbol-12-myristate-13-acetate-induced protein 1                                           |

|                 |      |           |                                                                                               |
|-----------------|------|-----------|-----------------------------------------------------------------------------------------------|
| TC16002034.hg.1 | 5.06 | MT2A      | metallothionein 2A                                                                            |
| TC09000585.hg.1 | 4.94 | C9orf91   | chromosome 9 open reading frame 91                                                            |
| TC02000671.hg.1 | 4.80 | SOWAHC    | sosondowah ankyrin repeat domain family member C                                              |
| TC03000636.hg.1 | 4.66 | DIRC2     | disrupted in renal carcinoma 2                                                                |
| TC12001751.hg.1 | 4.63 | PHLDA1    | pleckstrin homology-like domain, family A, member 1                                           |
| TC09000962.hg.1 | 4.49 | IFNE      | interferon, epsilon                                                                           |
| TC03003402.hg.1 | 4.36 | TM4SF19   | transmembrane 4 L six family member 19                                                        |
| TC03003333.hg.1 | 4.33 | ETV5      | ets variant 5                                                                                 |
| TC20000599.hg.1 | 4.20 | GPCPD1    | glycerophosphocholine phosphodiesterase GDE1 homolog (S. cerevisiae)                          |
| TC19001586.hg.1 | 4.18 | LYPD3     | LY6/PLAUR domain containing 3                                                                 |
| TC02001948.hg.1 | 4.11 | GFPT1     | glutamine--fructose-6-phosphate transaminase 1                                                |
| TC01001423.hg.1 | 4.09 | DDR2      | discoidin domain receptor tyrosine kinase 2                                                   |
| TC05000179.hg.1 | 4.04 | OSMR      | oncostatin M receptor                                                                         |
| TC06000779.hg.1 | 3.99 | NT5E      | 5'-nucleotidase, ecto (CD73)                                                                  |
| TC11000957.hg.1 | 3.98 | BIRC2     | baculoviral IAP repeat containing 2                                                           |
| TC01001777.hg.1 | 3.83 | ATF3      | activating transcription factor 3                                                             |
| TC07001630.hg.1 | 3.80 | ASNS      | asparagine synthetase (glutamine-hydrolyzing)                                                 |
| TC03001720.hg.1 | 3.75 | HEG1      | HEG homolog 1 (zebrafish)                                                                     |
| TC16000095.hg.1 | 3.75 | TNFRSF12A | tumor necrosis factor receptor superfamily, member 12A                                        |
| TC02004970.hg.1 | 3.74 | MXD1      | MAX dimerization protein 1                                                                    |
| TC10000434.hg.1 | 3.68 | SGPL1     | sphingosine-1-phosphate lyase 1                                                               |
| TC02001071.hg.1 | 3.64 | OSBPL6    | oxysterol binding protein-like 6                                                              |
| TC03000917.hg.1 | 3.62 | SKIL      | SKI-like oncogene                                                                             |
| TC18000149.hg.1 | 3.60 | MOCOS     | molybdenum cofactor sulfurase                                                                 |
| TC19001754.hg.1 | 3.54 | C19orf48  | chromosome 19 open reading frame 48                                                           |
| TC02000374.hg.1 | 3.53 | SLC1A4    | solute carrier family 1 (glutamate/neutral amino acid transporter), member 4                  |
| TC08000520.hg.1 | 3.53 | CHMP4C    | charged multivesicular body protein 4C                                                        |
| TC17000794.hg.1 | 3.52 | PITPNC1   | phosphatidylinositol transfer protein, cytoplasmic 1                                          |
| TC02000281.hg.1 | 3.52 | EPAS1     | endothelial PAS domain protein 1                                                              |
| TC16000473.hg.1 | 3.47 | MT1F      | metallothionein 1F                                                                            |
| TC12000159.hg.1 | 3.46 | GABARAPL1 | GABA(A) receptor-associated protein like 1                                                    |
| TC03001699.hg.1 | 3.45 | IQCB1     | IQ motif containing B1                                                                        |
| TC16000989.hg.1 | 3.40 | NUPR1     | nuclear protein, transcriptional regulator, 1                                                 |
| TC01002478.hg.1 | 3.39 | RNF19B    | ring finger protein 19B                                                                       |
| TC19001656.hg.1 | 3.39 | SLC1A5    | solute carrier family 1 (neutral amino acid transporter), member 5                            |
| TC12001910.hg.1 | 3.38 | ALDH1L2   | aldehyde dehydrogenase 1 family, member L2                                                    |
| TC06002024.hg.1 | 3.37 | TUBE1     | tubulin, epsilon 1                                                                            |
| TC16000823.hg.1 | 3.31 | CREBBP    | CREB binding protein                                                                          |
| TC18001001.hg.1 | 3.30 | SERPINB8  | serpin peptidase inhibitor, clade B (ovalbumin), member 8                                     |
| TC01003663.hg.1 | 3.30 | ZBTB41    | zinc finger and BTB domain containing 41                                                      |
| TC01003566.hg.1 | 3.22 | ABL2      | v-abl Abelson murine leukemia viral oncogene homolog 2                                        |
| TC02002823.hg.1 | 3.20 | SERPINE2  | serpin peptidase inhibitor, clade E (nexin, plasminogen activator inhibitor type 1), member 2 |

|                 |      |              |                                                                                            |
|-----------------|------|--------------|--------------------------------------------------------------------------------------------|
| TC11001027.hg.1 | 3.19 | NNMT         | nicotinamide N-methyltransferase                                                           |
| TC05000389.hg.1 | 3.18 | JMY          | junction mediating and regulatory protein, p53 cofactor                                    |
| TC19002665.hg.1 | 3.18 | ZNF134       | zinc finger protein 134                                                                    |
| TC01000841.hg.1 | 3.17 | LRRC8D       | leucine rich repeat containing 8 family, member D                                          |
| TC09001325.hg.1 | 3.17 | NFIL3        | nuclear factor, interleukin 3 regulated                                                    |
| TC07001868.hg.1 | 3.17 | LOC646329    | uncharacterized LOC646329                                                                  |
| TC07000112.hg.1 | 3.15 | AHR          | aryl hydrocarbon receptor                                                                  |
| TC17001560.hg.1 | 3.15 | ETV4         | ets variant 4                                                                              |
| TC18000100.hg.1 | 3.14 | RIOK3        | RIO kinase 3 (yeast)                                                                       |
| TC02004916.hg.1 | 3.10 | C2orf18      | chromosome 2 open reading frame 18                                                         |
| TC11002165.hg.1 | 3.10 | PICALM       | phosphatidylinositol binding clathrin assembly protein                                     |
| TC06000062.hg.1 | 3.03 | BMP6         | bone morphogenetic protein 6                                                               |
| TC12003284.hg.1 | 3.02 | RHOF         | ras homolog family member F (in filopodia)                                                 |
| TC16000693.hg.1 | 3.02 | ZNF778       | zinc finger protein 778                                                                    |
| TC19000055.hg.1 | 3.02 | GADD45B      | growth arrest and DNA-damage-inducible, beta                                               |
| TC0X002330.hg.1 | 3.00 | PRAF2        | PRA1 domain family, member 2                                                               |
| TC14001509.hg.1 | 2.99 | WARS         | tryptophanyl-tRNA synthetase                                                               |
| TC11001124.hg.1 | 2.93 | GRAMD1B      | GRAM domain containing 1B                                                                  |
| TC08001216.hg.1 | 2.91 | TCEA1        | transcription elongation factor A (SII), 1                                                 |
| TC01001624.hg.1 | 2.90 | RGS2         | regulator of G-protein signaling 2, 24kDa                                                  |
| TC11001289.hg.1 | 2.90 | CARS         | cysteinyl-tRNA synthetase                                                                  |
| TC19000174.hg.1 | 2.90 | ICAM1        | intercellular adhesion molecule 1                                                          |
| TC07000307.hg.1 | 2.90 | UPP1         | uridine phosphorylase 1                                                                    |
| TC14002296.hg.1 | 2.89 | CTAGE5       | CTAGE family, member 5                                                                     |
| TC19000228.hg.1 | 2.89 | JUNB         | jun B proto-oncogene                                                                       |
| TC21000284.hg.1 | 2.89 | HSPA13       | heat shock protein 70kDa family, member 13                                                 |
| TC05001137.hg.1 | 2.88 | MED10        | mediator complex subunit 10                                                                |
| TC01001358.hg.1 | 2.87 | LOC100505633 | uncharacterized LOC100505633                                                               |
| TC13000523.hg.1 | 2.85 | SLC7A1       | solute carrier family 7 (cationic amino acid transporter, y <sup>+</sup> system), member 1 |
| TC0X000528.hg.1 | 2.85 | MID2         | midline 2                                                                                  |
| TC03000212.hg.1 | 2.85 | ZNF621       | zinc finger protein 621                                                                    |
| TC17001796.hg.1 | 2.83 | ERN1         | endoplasmic reticulum to nucleus signaling 1                                               |
| TC11000956.hg.1 | 2.83 | BIRC3        | baculoviral IAP repeat containing 3                                                        |
| TC0X001056.hg.1 | 2.82 | SSX2B        | synovial sarcoma, X breakpoint 2B                                                          |
| TC19000544.hg.1 | 2.82 | ZFP36        | zinc finger protein 36, C3H type, homolog (mouse)                                          |
| TC10001329.hg.1 | 2.82 | JMJD1C       | jumonji domain containing 1C                                                               |
| TC06000508.hg.1 | 2.82 | UHRF1BP1     | UHRF1 binding protein 1                                                                    |
| TC07000328.hg.1 | 2.81 | EGFR         | epidermal growth factor receptor                                                           |
| TC03003341.hg.1 | 2.80 | ACAD11       | acyl-CoA dehydrogenase family, member 11                                                   |
| TC20000009.hg.1 | 2.80 | TRIB3        | tribbles homolog 3 (Drosophila)                                                            |
| TC0X000346.hg.1 | 2.80 | FAAH2        | fatty acid amide hydrolase 2                                                               |
| TC01003328.hg.1 | 2.80 | ARHGEF2      | Rho/Rac guanine nucleotide exchange factor (GEF) 2                                         |
| TC0X000306.hg.1 | 2.79 | SSX2B        | synovial sarcoma, X breakpoint 2B                                                          |
| TC22000796.hg.1 | 2.79 | JOSD1        | Josephin domain containing 1                                                               |

|                 |      |              |                                                                            |
|-----------------|------|--------------|----------------------------------------------------------------------------|
| TC17000764.hg.1 | 2.78 | TANC2        | tetratricopeptide repeat, ankyrin repeat and coiled-coil containing 2      |
| TC01001414.hg.1 | 2.77 | ATF6         | activating transcription factor 6                                          |
| TC12000564.hg.1 | 2.77 | SRGAP1       | SLIT-ROBO Rho GTPase activating protein 1                                  |
| TC03000207.hg.1 | 2.77 | EIF1B        | eukaryotic translation initiation factor 1B                                |
| TC16000471.hg.1 | 2.77 | MT1CP        | metallothionein 1C, pseudogene                                             |
| TC01000639.hg.1 | 2.77 | ZFYVE9       | zinc finger, FYVE domain containing 9                                      |
| TC22000430.hg.1 | 2.74 | KLHDC7B      | kelch domain containing 7B                                                 |
| TC16000476.hg.1 | 2.73 | MT1X         | metallothionein 1X                                                         |
| TC11001948.hg.1 | 2.71 | FOSL1        | FOS-like antigen 1                                                         |
| TC12000340.hg.1 | 2.71 | SLC48A1      | solute carrier family 48 (heme transporter), member 1                      |
| TC03000127.hg.1 | 2.69 | NR1D2        | nuclear receptor subfamily 1, group D, member 2                            |
| TC12001282.hg.1 | 2.69 | EPS8         | epidermal growth factor receptor pathway substrate 8                       |
| TC19001377.hg.1 | 2.69 | LOC148189    | uncharacterized LOC148189                                                  |
| TC22000223.hg.1 | 2.68 | RNF185       | ring finger protein 185                                                    |
| TC06001057.hg.1 | 2.67 | STX11        | syntaxin 11                                                                |
| TC19000256.hg.1 | 2.67 | CD97         | CD97 molecule                                                              |
| TC07001823.hg.1 | 2.67 | WASL         | Wiskott-Aldrich syndrome-like                                              |
| TC04000319.hg.1 | 2.67 | SRD5A3       | steroid 5 alpha-reductase 3                                                |
| TC06001546.hg.1 | 2.66 | HSPA1L       | heat shock 70kDa protein 1-like                                            |
| TC03000978.hg.1 | 2.66 | B3GNT5       | UDP-GlcNAc:betaGal beta-1,3-N-acetylglucosaminyltransferase 5              |
| TC12000726.hg.1 | 2.66 | SOCS2        | suppressor of cytokine signaling 2                                         |
| TC09000400.hg.1 | 2.66 | CTSL1        | cathepsin L1                                                               |
| TC0X000216.hg.1 | 2.65 | ZNF673       | zinc finger family member 673                                              |
| TC04001092.hg.1 | 2.65 | SEL1L3       | sel-1 suppressor of lin-12-like 3 (C. elegans)                             |
| TC19000237.hg.1 | 2.65 | IER2         | immediate early response 2                                                 |
| TC09000572.hg.1 | 2.64 | SLC31A1      | solute carrier family 31 (copper transporters), member 1                   |
| TC10001097.hg.1 | 2.64 | DNAJC1       | DnaJ (Hsp40) homolog, subfamily C, member 1                                |
| TC01003903.hg.1 | 2.63 | CDC42BPA     | CDC42 binding protein kinase alpha (DMPK-like)                             |
| TC19001151.hg.1 | 2.62 | ZNF562       | zinc finger protein 562                                                    |
| TC16001234.hg.1 | 2.62 | AARS         | alanyl-tRNA synthetase                                                     |
| TC01002979.hg.1 | 2.62 | LRIF1        | ligand dependent nuclear receptor interacting factor 1                     |
| TC18000132.hg.1 | 2.62 | RNF125       | ring finger protein 125, E3 ubiquitin protein ligase                       |
| TC22000627.hg.1 | 2.62 | XBP1         | X-box binding protein 1                                                    |
| TC04000437.hg.1 | 2.61 | ANXA3        | annexin A3                                                                 |
| TC17000868.hg.1 | 2.61 | FAM100B      | family with sequence similarity 100, member B                              |
| TC08001369.hg.1 | 2.61 | SLC10A5      | solute carrier family 10 (sodium/bile acid cotransporter family), member 5 |
| TC16000501.hg.1 | 2.61 | CCDC113      | coiled-coil domain containing 113                                          |
| TC09001283.hg.1 | 2.60 | C9orf64      | chromosome 9 open reading frame 64                                         |
| TC01001840.hg.1 | 2.60 | LOC100287934 | uncharacterized LOC100287934                                               |
| TC18000021.hg.1 | 2.60 | MGC11082     | hypothetical LOC84777                                                      |
| TC12000189.hg.1 | 2.60 | EMP1         | epithelial membrane protein 1                                              |
| TC11000742.hg.1 | 2.60 | FAM86C1      | family with sequence similarity 86, member C1                              |
| TC03001071.hg.1 | 2.59 | HES1         | hairy and enhancer of split 1, (Drosophila)                                |

|                 |      |              |                                                                                                |
|-----------------|------|--------------|------------------------------------------------------------------------------------------------|
| TC10000122.hg.1 | 2.59 | PTER         | phosphotriesterase related                                                                     |
| TC01002163.hg.1 | 2.58 | TNFRSF9      | tumor necrosis factor receptor superfamily, member 9                                           |
| TC16000079.hg.1 | 2.57 | LOC652276    | potassium channel tetramerisation domain containing 5 pseudogene                               |
| TC16000916.hg.1 | 2.56 | SMG1         | smg-1 homolog, phosphatidylinositol 3-kinase-related kinase (C. elegans)                       |
| TC17001064.hg.1 | 2.56 | KIAA0753     | KIAA0753                                                                                       |
| TC04000239.hg.1 | 2.56 | N4BP2        | NEDD4 binding protein 2                                                                        |
| TC02002818.hg.1 | 2.55 | SCG2         | secretogranin II                                                                               |
| TC01001452.hg.1 | 2.55 | POGK         | pogo transposable element with KRAB domain                                                     |
| TC15002782.hg.1 | 2.55 | AP3S2        | adaptor-related protein complex 3, sigma 2 subunit                                             |
| TC16000480.hg.1 | 2.55 | HERPUD1      | homocysteine-inducible, endoplasmic reticulum stress-inducible, ubiquitin-like domain member 1 |
| TC0X000787.hg.1 | 2.55 | F8A2         | coagulation factor VIII-associated 2                                                           |
| TC03000632.hg.1 | 2.54 | DTX3L        | deltex 3-like (Drosophila)                                                                     |
| TC01001895.hg.1 | 2.54 | RNF187       | ring finger protein 187                                                                        |
| TC12001216.hg.1 | 2.54 | OLR1         | oxidized low density lipoprotein (lectin-like) receptor 1                                      |
| TC15002767.hg.1 | 2.53 | NGRN         | neugrin, neurite outgrowth associated                                                          |
| TC05001610.hg.1 | 2.52 | ELL2         | elongation factor, RNA polymerase II, 2                                                        |
| TC19000576.hg.1 | 2.52 | AXL          | AXL receptor tyrosine kinase                                                                   |
| TC06000120.hg.1 | 2.52 | RNF144B      | ring finger protein 144B                                                                       |
| TC03000378.hg.1 | 2.52 | PXK          | PX domain containing serine/threonine kinase                                                   |
| TC12000936.hg.1 | 2.52 | PRKAB1       | protein kinase, AMP-activated, beta 1 non-catalytic subunit                                    |
| TC06002297.hg.1 | 2.51 | PDE10A       | phosphodiesterase 10A                                                                          |
| TC12001456.hg.1 | 2.51 | CCNT1        | cyclin T1                                                                                      |
| TC14000439.hg.1 | 2.50 | PSEN1        | presenilin 1                                                                                   |
| TC08000997.hg.1 | 2.49 | LONRF1       | LON peptidase N-terminal domain and ring finger 1                                              |
| TC15002777.hg.1 | 2.49 | PARP6        | poly (ADP-ribose) polymerase family, member 6                                                  |
| TC12001928.hg.1 | 2.49 | PRDM4        | PR domain containing 4                                                                         |
| TC15001110.hg.1 | 2.49 | TJP1         | tight junction protein 1 (zona occludens 1)                                                    |
| TC10000882.hg.1 | 2.48 | LOC100130887 | uncharacterized LOC100130887                                                                   |
| TC02000703.hg.1 | 2.48 | TMEM87B      | transmembrane protein 87B                                                                      |
| TC12001598.hg.1 | 2.47 | RNF41        | ring finger protein 41                                                                         |
| TC12001796.hg.1 | 2.47 | DUSP6        | dual specificity phosphatase 6                                                                 |
| TC10000177.hg.1 | 2.46 | GPR158       | G protein-coupled receptor 158                                                                 |
| TC10000445.hg.1 | 2.46 | CHST3        | carbohydrate (chondroitin 6) sulfotransferase 3                                                |
| TC20000051.hg.1 | 2.46 | PRNP         | prion protein                                                                                  |
| TC12002074.hg.1 | 2.46 | ZCCHC8       | zinc finger, CCHC domain containing 8                                                          |
| TC08001099.hg.1 | 2.46 | DUSP4        | dual specificity phosphatase 4                                                                 |
| TC05001854.hg.1 | 2.45 | HBEGF        | heparin-binding EGF-like growth factor                                                         |
| TC10000449.hg.1 | 2.45 | DDIT4        | DNA-damage-inducible transcript 4                                                              |
| TC02002289.hg.1 | 2.45 | AMMECR1L     | AMME chromosomal region gene 1-like                                                            |
| TC01001588.hg.1 | 2.45 | TSEN15       | tRNA splicing endonuclease 15 homolog (S. cerevisiae)                                          |
| TC20000837.hg.1 | 2.45 | LOC388796    | uncharacterized LOC388796                                                                      |
| TC15001263.hg.1 | 2.44 | TMEM87A      | transmembrane protein 87A                                                                      |

|                 |      |              |                                                                                   |
|-----------------|------|--------------|-----------------------------------------------------------------------------------|
| TC01003198.hg.1 | 2.43 | OTUD7B       | OTU domain containing 7B                                                          |
| TC22000262.hg.1 | 2.42 | APOL6        | apolipoprotein L, 6                                                               |
| TC12001135.hg.1 | 2.42 | TNFRSF1A     | tumor necrosis factor receptor superfamily, member 1A                             |
| TC09000593.hg.1 | 2.42 | PAPPA        | pregnancy-associated plasma protein A, pappalysin 1                               |
| TC10000753.hg.1 | 2.42 | NFKB2        | nuclear factor of kappa light polypeptide gene enhancer in B-cells 2 (p49/p100)   |
| TC01003218.hg.1 | 2.41 | CDC42SE1     | CDC42 small effector 1                                                            |
| TC14000130.hg.1 | 2.41 | ABHD4        | abhydrolase domain containing 4                                                   |
| TC01001014.hg.1 | 2.41 | SLC22A15     | solute carrier family 22, member 15                                               |
| TC07000520.hg.1 | 2.40 | DMTF1        | cyclin D binding myb-like transcription factor 1                                  |
| TC10000979.hg.1 | 2.39 | KLF6         | Kruppel-like factor 6                                                             |
| TC12001068.hg.1 | 2.39 | ZNF84        | zinc finger protein 84                                                            |
| TC10000636.hg.1 | 2.39 | IFIT2        | interferon-induced protein with tetratricopeptide repeats 2                       |
| TC21001061.hg.1 | 2.38 | DOPEY2       | dopey family member 2                                                             |
| TC02000197.hg.1 | 2.38 | YPEL5        | yippee-like 5 (Drosophila)                                                        |
| TC08000943.hg.1 | 2.38 | MFHAS1       | malignant fibrous histiocytoma amplified sequence 1                               |
| TC12001176.hg.1 | 2.38 | FAM86FP      | family with sequence similarity 86, member F, pseudogene                          |
| TC07000198.hg.1 | 2.38 | GARS         | glycyl-tRNA synthetase                                                            |
| TC20000391.hg.1 | 2.38 | SLC9A8       | solute carrier family 9, subfamily A (NHE8, cation proton antiporter 8), member 8 |
| TC12001170.hg.1 | 2.38 | SLC2A3       | solute carrier family 2 (facilitated glucose transporter), member 3               |
| TC09000358.hg.1 | 2.37 | PSAT1        | phosphoserine aminotransferase 1                                                  |
| TC03000088.hg.1 | 2.36 | C3orf19      | chromosome 3 open reading frame 19                                                |
| TC0X000781.hg.1 | 2.36 | F8A2         | coagulation factor VIII-associated 2                                              |
| TC22000259.hg.1 | 2.36 | HMOX1        | heme oxygenase (decycling) 1                                                      |
| TC09000389.hg.1 | 2.36 | LOC389765    | kinesin family member 27 pseudogene                                               |
| TC06001313.hg.1 | 2.35 | MBOAT1       | membrane bound O-acyltransferase domain containing 1                              |
| TC19000624.hg.1 | 2.35 | PVR          | poliovirus receptor                                                               |
| TC16001350.hg.1 | 2.35 | ANKRD11      | ankyrin repeat domain 11                                                          |
| TC06000868.hg.1 | 2.34 | FOXO3        | forkhead box O3                                                                   |
| TC15001277.hg.1 | 2.34 | ZSCAN29      | zinc finger and SCAN domain containing 29                                         |
| TC15000417.hg.1 | 2.33 | MAPK6        | mitogen-activated protein kinase 6                                                |
| TC17001912.hg.1 | 2.32 | LOC100131096 | uncharacterized LOC100131096                                                      |
| TC02001950.hg.1 | 2.31 | AAK1         | AP2 associated kinase 1                                                           |
| TC01003205.hg.1 | 2.31 | MCL1         | myeloid cell leukemia sequence 1 (BCL2-related)                                   |
| TC06001132.hg.1 | 2.31 | TULP4        | tubby like protein 4                                                              |
| TC06002071.hg.1 | 2.31 | SERINC1      | serine incorporator 1                                                             |
| TC01000723.hg.1 | 2.31 | ROR1         | receptor tyrosine kinase-like orphan receptor 1                                   |
| TC09001374.hg.1 | 2.30 | SLC35D2      | solute carrier family 35, member D2                                               |
| TC03001956.hg.1 | 2.30 | KPNA4        | karyopherin alpha 4 (importin alpha 3)                                            |
| TC16001145.hg.1 | 2.30 | ZNF319       | zinc finger protein 319                                                           |
| TC01002258.hg.1 | 2.29 | EPHA2        | EPH receptor A2                                                                   |
| TC10000219.hg.1 | 2.29 | ZEB1         | zinc finger E-box binding homeobox 1                                              |
| TC19001301.hg.1 | 2.29 | NR2C2AP      | nuclear receptor 2C2-associated protein                                           |



|                         |      |              |                                                                                          |
|-------------------------|------|--------------|------------------------------------------------------------------------------------------|
| TC11002136.hg.1         | 2.29 | GAB2         | GRB2-associated binding protein 2                                                        |
| TC17000103.hg.1         | 2.29 | CD68         | CD68 molecule                                                                            |
| TC05001944.hg.1         | 2.29 | ZNF300       | zinc finger protein 300                                                                  |
| TC21000436.hg.1         | 2.28 | HLCS         | holocarboxylase synthetase (biotin-(propionyl-CoA-carboxylase (ATP-hydrolysing)) ligase) |
| TC01003240.hg.1         | 2.28 | S100A11      | S100 calcium binding protein A11                                                         |
| TC6_mcf_hap5000211.hg.1 | 2.27 | LY6G5B       | lymphocyte antigen 6 complex, locus G5B                                                  |
| TC05001524.hg.1         | 2.27 | MTX3         | metaxin 3                                                                                |
| TC03000803.hg.1         | 2.27 | HPS3         | Hermansky-Pudlak syndrome 3                                                              |
| TC10001626.hg.1         | 2.26 | NT5C2        | 5'-nucleotidase, cytosolic II                                                            |
| TC21000169.hg.1         | 2.26 | ETS2         | v-ets erythroblastosis virus E26 oncogene homolog 2 (avian)                              |
| TC19000439.hg.1         | 2.26 | KCTD15       | potassium channel tetramerisation domain containing 15                                   |
| TC17001465.hg.1         | 2.26 | TNS4         | tensin 4                                                                                 |
| TC17000707.hg.1         | 2.26 | DYNLL2       | dynein, light chain, LC8-type 2                                                          |
| TC16000469.hg.1         | 2.26 | MT1JP        | metallothionein 1J, pseudogene                                                           |
| TC03001563.hg.1         | 2.26 | FAM86DP      | family with sequence similarity 86, member D, pseudogene                                 |
| TC05001589.hg.1         | 2.26 | LOC100505994 | uncharacterized LOC100505994                                                             |
| TC01002708.hg.1         | 2.26 | JUN          | jun proto-oncogene                                                                       |
| TC09000320.hg.1         | 2.25 | FAM189A2     | family with sequence similarity 189, member A2                                           |
| TC11002351.hg.1         | 2.25 | IFT46        | intraflagellar transport 46 homolog (Chlamydomonas)                                      |
| TC12000078.hg.1         | 2.25 | LTBR         | lymphotoxin beta receptor (TNFR superfamily, member 3)                                   |
| TC01003124.hg.1         | 2.25 | PRKAB2       | protein kinase, AMP-activated, beta 2 non-catalytic subunit                              |
| TC13000584.hg.1         | 2.24 | PROSER1      | proline and serine rich 1                                                                |
| TC01003112.hg.1         | 2.24 | POLR3C       | polymerase (RNA) III (DNA directed) polypeptide C (62kD)                                 |
| TC0X001257.hg.1         | 2.24 | MORC4        | MORC family CW-type zinc finger 4                                                        |
| TC06002238.hg.1         | 2.23 | SYNE1        | spectrin repeat containing, nuclear envelope 1                                           |
| TC0X000991.hg.1         | 2.23 | ZNF674       | zinc finger protein 674                                                                  |
| TC15000431.hg.1         | 2.23 | FLJ27352     | uncharacterized LOC145788                                                                |
| TC05002153.hg.1         | 2.23 | ZFP62        | zinc finger protein 62 homolog (mouse)                                                   |
| TC05001822.hg.1         | 2.22 | FAM13B       | family with sequence similarity 13, member B                                             |
| TC01000757.hg.1         | 2.21 | CTH          | cystathionase (cystathionine gamma-lyase)                                                |
| TC17000619.hg.1         | 2.21 | NFE2L1       | nuclear factor (erythroid-derived 2)-like 1                                              |
| TC11002393.hg.1         | 2.21 | CLMP         | CXADR-like membrane protein                                                              |
| TC10002945.hg.1         | 2.21 | ENTPD7       | ectonucleoside triphosphate diphosphohydrolase 7                                         |
| TC08000324.hg.1         | 2.20 | AP3M2        | adaptor-related protein complex 3, mu 2 subunit                                          |
| TC16000638.hg.1         | 2.19 | GAN          | gigaxonin                                                                                |
| TC17000631.hg.1         | 2.19 | CALCOCO2     | calcium binding and coiled-coil domain 2                                                 |
| TC6_cox_hap2000242.hg.1 | 2.19 | LY6G5B       | lymphocyte antigen 6 complex, locus G5B                                                  |
| TC17001925.hg.1         | 2.19 | CANT1        | calcium activated nucleotidase 1                                                         |
| TC01001043.hg.1         | 2.18 | PHGDH        | phosphoglycerate dehydrogenase                                                           |
| TC03001169.hg.1         | 2.18 | TIMP4        | TIMP metalloproteinase inhibitor 4                                                       |
| TC04001660.hg.1         | 2.18 | PLRG1        | pleiotropic regulator 1                                                                  |
| TC19001588.hg.1         | 2.18 | ETHE1        | ethylmalonic encephalopathy 1                                                            |

|                              |      |              |                                                                             |
|------------------------------|------|--------------|-----------------------------------------------------------------------------|
| TC6_dbb_hap3000<br>220.hg.1  | 2.18 | LY6G5B       | lymphocyte antigen 6 complex, locus G5B                                     |
| TC6_mann_hap400<br>0194.hg.1 | 2.18 | LY6G5B       | lymphocyte antigen 6 complex, locus G5B                                     |
| TC09000647.hg.1              | 2.18 | RABEPK       | Rab9 effector protein with kelch motifs                                     |
| TC22000881.hg.1              | 2.18 | LOC100271722 | uncharacterized LOC100271722                                                |
| TC03000056.hg.1              | 2.18 | IRAK2        | interleukin-1 receptor-associated kinase 2                                  |
| TC15001736.hg.1              | 2.18 | EFTUD1       | elongation factor Tu GTP binding domain<br>containing 1                     |
| TC01004071.hg.1              | 2.17 | ZNF496       | zinc finger protein 496                                                     |
| TC09000143.hg.1              | 2.17 | ANKRD18B     | ankyrin repeat domain 18B                                                   |
| TC06000532.hg.1              | 2.17 | CDKN1A       | cyclin-dependent kinase inhibitor 1A (p21, Cip1)                            |
| TC17000371.hg.1              | 2.17 | LRRC37B      | leucine rich repeat containing 37B                                          |
| TC6_qbl_hap60002<br>23.hg.1  | 2.17 | LY6G5B       | lymphocyte antigen 6 complex, locus G5B                                     |
| TC6_ssto_hap7000<br>197.hg.1 | 2.17 | LY6G5B       | lymphocyte antigen 6 complex, locus G5B                                     |
| TC17000210.hg.1              | 2.17 | SMCR8        | Smith-Magenis syndrome chromosome region,<br>candidate 8                    |
| TC20000878.hg.1              | 2.17 | SDC4         | syndecan 4                                                                  |
| TC19002701.hg.1              | 2.17 | FBXO17       | F-box protein 17                                                            |
| TC19001730.hg.1              | 2.17 | VRK3         | vaccinia related kinase 3                                                   |
| TC07001417.hg.1              | 2.16 | LOC650226    | ankyrin repeat domain 26 pseudogene                                         |
| TC01002882.hg.1              | 2.15 | GCLM         | glutamate-cysteine ligase, modifier subunit                                 |
| TC03000039.hg.1              | 2.15 | MTMR14       | myotubularin related protein 14                                             |
| TC15000802.hg.1              | 2.15 | LOC648809    | elongation factor Tu GTP-binding domain-<br>containing protein 1 pseudogene |
| TC07003306.hg.1              | 2.15 | OR2A7        | olfactory receptor, family 2, subfamily A, member<br>7                      |
| TC16001135.hg.1              | 2.15 | MT1G         | metallothionein 1G                                                          |
| TC06002181.hg.1              | 2.14 | HIVP2        | human immunodeficiency virus type I enhancer<br>binding protein 2           |
| TC01002845.hg.1              | 2.14 | GBP3         | guanylate binding protein 3                                                 |
| TC19000621.hg.1              | 2.14 | ZNF227       | zinc finger protein 227                                                     |
| TC07001618.hg.1              | 2.14 | PDK4         | pyruvate dehydrogenase kinase, isozyme 4                                    |
| TC17001808.hg.1              | 2.13 | GNA13        | guanine nucleotide binding protein (G protein),<br>alpha 13                 |
| TC10000909.hg.1              | 2.13 | ZRANB1       | zinc finger, RAN-binding domain containing 1                                |
| TC16001132.hg.1              | 2.13 | AMFR         | autocrine motility factor receptor, E3 ubiquitin<br>protein ligase          |
| TC14001149.hg.1              | 2.13 | CNIH         | cornichon homolog (Drosophila)                                              |
| TC6_ssto_hap7000<br>120.hg.1 | 2.13 | PPP1R18      | protein phosphatase 1, regulatory subunit 18                                |
| TC05001366.hg.1              | 2.13 | IL6ST        | interleukin 6 signal transducer (gp130, oncostatin<br>M receptor)           |
| TC07000068.hg.1              | 2.12 | C7orf26      | chromosome 7 open reading frame 26                                          |
| TC04000440.hg.1              | 2.12 | BMP2K        | BMP2 inducible kinase                                                       |
| TC12003210.hg.1              | 2.12 | ETV6         | ets variant 6                                                               |
| TC13000571.hg.1              | 2.12 | FAM48A       | family with sequence similarity 48, member A                                |
| TC09000999.hg.1              | 2.12 | DDX58        | DEAD (Asp-Glu-Ala-Asp) box polypeptide 58                                   |
| TC0X000732.hg.1              | 2.12 | PASD1        | PAS domain containing 1                                                     |
| TC0X002343.hg.1              | 2.12 | IDS          | iduronate 2-sulfatase                                                       |
| TC04000221.hg.1              | 2.11 | KLF3         | Kruppel-like factor 3 (basic)                                               |
| TC16000293.hg.1              | 2.11 | IL4R         | interleukin 4 receptor                                                      |

|                         |      |              |                                                                                                      |
|-------------------------|------|--------------|------------------------------------------------------------------------------------------------------|
| TC11002246.hg.1         | 2.11 | CASP4        | caspase 4, apoptosis-related cysteine peptidase                                                      |
| TC16000842.hg.1         | 2.11 | FAM86A       | family with sequence similarity 86, member A                                                         |
| TC18000524.hg.1         | 2.11 | CCDC68       | coiled-coil domain containing 68                                                                     |
| TC08001210.hg.1         | 2.11 | RB1CC1       | RB1-inducible coiled-coil 1                                                                          |
| TC01003985.hg.1         | 2.11 | IRF2BP2      | interferon regulatory factor 2 binding protein 2                                                     |
| TC08000281.hg.1         | 2.10 | EIF4EBP1     | eukaryotic translation initiation factor 4E binding protein 1                                        |
| TC06001232.hg.1         | 2.10 | PXDC1        | PX domain containing 1                                                                               |
| TC10000596.hg.1         | 2.09 | FAM190B      | family with sequence similarity 190, member B                                                        |
| TC22001458.hg.1         | 2.09 | SPECC1L      | sperm antigen with calponin homology and coiled-coil domains 1-like                                  |
| TC11002002.hg.1         | 2.09 | CHKA         | choline kinase alpha                                                                                 |
| TC02001359.hg.1         | 2.09 | RHBDD1       | rhomboid domain containing 1                                                                         |
| TC01006386.hg.1         | 2.09 | PYCR2        | pyrroline-5-carboxylate reductase family, member 2                                                   |
| TC19000191.hg.1         | 2.09 | LDLR         | low density lipoprotein receptor                                                                     |
| TC06000306.hg.1         | 2.09 | HCG15        | HLA complex group 15                                                                                 |
| TC06000549.hg.1         | 2.09 | ZFAND3       | zinc finger, AN1-type domain 3                                                                       |
| TC06001962.hg.1         | 2.09 | FAXC         | failed axon connections homolog (Drosophila)                                                         |
| TC10000440.hg.1         | 2.09 | SLC29A3      | solute carrier family 29 (nucleoside transporters), member 3                                         |
| TC13000394.hg.1         | 2.09 | CARKD        | carbohydrate kinase domain containing                                                                |
| TC12000531.hg.1         | 2.08 | MARS         | methionyl-tRNA synthetase                                                                            |
| TC05000818.hg.1         | 2.08 | GRPEL2       | GrpE-like 2, mitochondrial (E. coli)                                                                 |
| TC11000793.hg.1         | 2.08 | RNF169       | ring finger protein 169                                                                              |
| TC04000485.hg.1         | 2.08 | HERC5        | HECT and RLD domain containing E3 ubiquitin protein ligase 5                                         |
| TC13000763.hg.1         | 2.07 | SPRY2        | sprouty homolog 2 (Drosophila)                                                                       |
| TC18000189.hg.1         | 2.07 | RAB27B       | RAB27B, member RAS oncogene family                                                                   |
| TC01004093.hg.1         | 2.07 | LOC646627    | phospholipase inhibitor                                                                              |
| TC01001289.hg.1         | 2.07 | SLC50A1      | solute carrier family 50 (sugar transporter), member 1                                               |
| TC07000254.hg.1         | 2.07 | CDK13        | cyclin-dependent kinase 13                                                                           |
| TC15002769.hg.1         | 2.06 | CHD2         | chromodomain helicase DNA binding protein 2                                                          |
| TC05003443.hg.1         | 2.06 | LOC100132287 | uncharacterized LOC100132287                                                                         |
| TC05000303.hg.1         | 2.06 | MARVELD2     | MARVEL domain containing 2                                                                           |
| TC13000552.hg.1         | 2.06 | CG030        | uncharacterized CG030                                                                                |
| TC05002075.hg.1         | 2.06 | STC2         | stanniocalcin 2                                                                                      |
| TC16001218.hg.1         | 2.06 | CTF8         | CTF8, chromosome transmission fidelity factor 8 homolog (S. cerevisiae)                              |
| TC20000621.hg.1         | 2.06 | JAG1         | jagged 1                                                                                             |
| TC07001279.hg.1         | 2.06 | HERPUD2      | HERPUD family member 2                                                                               |
| TC02000454.hg.1         | 2.06 | MTHFD2       | methylenetetrahydrofolate dehydrogenase (NADP+ dependent) 2, methenyltetrahydrofolate cyclohydrolase |
| TC08000995.hg.1         | 2.06 | FAM86B2      | family with sequence similarity 86, member B2                                                        |
| TC05001689.hg.1         | 2.05 | FEM1C        | fem-1 homolog c (C. elegans)                                                                         |
| TC03001464.hg.1         | 2.05 | SFMBT1       | Scm-like with four mbt domains 1                                                                     |
| TC17001772.hg.1         | 2.05 | MED13        | mediator complex subunit 13                                                                          |
| TC15000827.hg.1         | 2.05 | AKAP13       | A kinase (PRKA) anchor protein 13                                                                    |
| TCUn_gl00022300005.hg.1 | 2.05 | ZNF26        | zinc finger protein 26                                                                               |

|                          |      |          |                                                              |
|--------------------------|------|----------|--------------------------------------------------------------|
| TC15000628.hg.1          | 2.05 | FEM1B    | fem-1 homolog b (C. elegans)                                 |
| TC16000472.hg.1          | 2.04 | MT1B     | metallothionein 1B                                           |
| TC07000495.hg.1          | 2.04 | PTPN12   | protein tyrosine phosphatase, non-receptor type 12           |
| TC04000258.hg.1          | 2.04 | DCAF4L1  | DDB1 and CUL4 associated factor 4-like 1                     |
| TC04000611.hg.1          | 2.04 | USP53    | ubiquitin specific peptidase 53                              |
| TC14002302.hg.1          | 2.04 | ZNF410   | zinc finger protein 410                                      |
| TC01000462.hg.1          | 2.04 | EIF2C4   | eukaryotic translation initiation factor 2C, 4               |
| TC06000960.hg.1          | 2.04 | HEY2     | hairy/enhancer-of-split related with YRPW motif 2            |
| TC11001939.hg.1          | 2.04 | RELA     | v-rel reticuloendotheliosis viral oncogene homolog A (avian) |
| TC11000399.hg.1          | 2.03 | ATG13    | autophagy related 13                                         |
| TC05000083.hg.1          | 2.03 | TRIO     | triple functional domain (PTPRF interacting)                 |
| TC22000282.hg.1          | 2.03 | CDC42EP1 | CDC42 effector protein (Rho GTPase binding) 1                |
| TC12001129.hg.1          | 2.03 | ANO2     | anoctamin 2                                                  |
| TC08000988.hg.1          | 2.03 | FAM86B1  | family with sequence similarity 86, member B1                |
| TC02002212.hg.1          | 2.03 | ZC3H8    | zinc finger CCCH-type containing 8                           |
| TC05000958.hg.1          | 2.03 | CREBRF   | CREB3 regulatory factor                                      |
| TC09001070.hg.1          | 2.02 | RNF38    | ring finger protein 38                                       |
| TC16000959.hg.1          | 2.02 | USP31    | ubiquitin specific peptidase 31                              |
| TC17001615.hg.1          | 2.02 | WNT3     | wingless-type MMTV integration site family, member 3         |
| TC08001765.hg.1          | 2.02 | ZNF252P  | zinc finger protein 252, pseudogene                          |
| TC12000266.hg.1          | 2.02 | PPFIBP1  | PTPRF interacting protein, binding protein 1 (liprin beta 1) |
| TC0X000278.hg.1          | 2.02 | CLCN5    | chloride channel, voltage-sensitive 5                        |
| TC06001029.hg.1          | 2.01 | KIAA1244 | KIAA1244                                                     |
| TC18000998.hg.1          | 2.01 | SMAD4    | SMAD family member 4                                         |
| TC12001807.hg.1          | 2.01 | BTG1     | B-cell translocation gene 1, anti-proliferative              |
| TC01000549.hg.1          | 2.01 | KDM4A    | lysine (K)-specific demethylase 4A                           |
| TC03001565.hg.1          | 2.01 | ZNF717   | zinc finger protein 717                                      |
| TC12001501.hg.1          | 2.01 | CSRNP2   | cysteine-serine-rich nuclear protein 2                       |
| TC12001067.hg.1          | 2.01 | ZNF26    | zinc finger protein 26                                       |
| TCUn_g1000223000004.hg.1 | 2.00 | ZNF84    | zinc finger protein 84                                       |
| TC02000368.hg.1          | 2.00 | AFTPH    | aftiphilin                                                   |

### Down-regulated

| Probe Set ID    | Fold change | Gene Symbol | Gene Description                                                  |
|-----------------|-------------|-------------|-------------------------------------------------------------------|
| TC16000479.hg.1 | 28.46       | SLC12A3     | solute carrier family 12 (sodium/chloride transporters), member 3 |
| TC07000810.hg.1 | 16.76       | CPA4        | carboxypeptidase A4                                               |
| TC12001566.hg.1 | 11.20       | CBX5        | chromobox homolog 5                                               |
| TC02001399.hg.1 | 11.12       | ALPPL2      | alkaline phosphatase, placental-like 2                            |
| TC16001085.hg.1 | 10.94       | MYLK3       | myosin light chain kinase 3                                       |
| TC11000149.hg.1 | 10.20       | OLFML1      | olfactomedin-like 1                                               |
| TC02001398.hg.1 | 9.61        | ALPP        | alkaline phosphatase, placental                                   |
| TC06004137.hg.1 | 8.60        | ARHGAP18    | Rho GTPase activating protein 18                                  |
| TC17000807.hg.1 | 7.64        | MAP2K6      | mitogen-activated protein kinase kinase 6                         |
| TC12002066.hg.1 | 7.60        | HPD         | 4-hydroxyphenylpyruvate dioxygenase                               |

|                 |      |              |                                                                                        |
|-----------------|------|--------------|----------------------------------------------------------------------------------------|
| TC18000324.hg.1 | 7.49 | PIEZO2       | piezo-type mechanosensitive ion channel component 2                                    |
| TC02002874.hg.1 | 7.31 | ECEL1        | endothelin converting enzyme-like 1                                                    |
| TC02001139.hg.1 | 6.74 | SLC39A10     | solute carrier family 39 (zinc transporter), member 10                                 |
| TC0X001396.hg.1 | 6.63 | FAM122B      | family with sequence similarity 122B                                                   |
| TC12000142.hg.1 | 6.47 | LOC100499405 | uncharacterized LOC100499405                                                           |
| TC19001041.hg.1 | 6.44 | AES          | amino-terminal enhancer of split                                                       |
| TC06001343.hg.1 | 6.42 | HIST1H2AB    | histone cluster 1, H2ab                                                                |
| TC12001155.hg.1 | 5.68 | LPCAT3       | lysophosphatidylcholine acyltransferase 3                                              |
| TC09000036.hg.1 | 5.67 | INSL4        | insulin-like 4 (placenta)                                                              |
| TC01002679.hg.1 | 5.59 | HSPB11       | heat shock protein family B (small), member 11                                         |
| TC12000399.hg.1 | 5.33 | METTL7A      | methyltransferase like 7A                                                              |
| TC10000302.hg.1 | 5.28 | PPYR1        | pancreatic polypeptide receptor 1                                                      |
| TC17002883.hg.1 | 4.92 | SLC25A10     | solute carrier family 25 (mitochondrial carrier; dicarboxylate transporter), member 10 |
| TC03001400.hg.1 | 4.91 | QARS         | glutamyl-tRNA synthetase                                                               |
| TC12000846.hg.1 | 4.70 | ACACB        | acetyl-CoA carboxylase beta                                                            |
| TC16000555.hg.1 | 4.43 | PRMT7        | protein arginine methyltransferase 7                                                   |
| TC07000276.hg.1 | 4.42 | OGDH         | oxoglutarate (alpha-ketoglutarate) dehydrogenase (lipoamide)                           |
| TC15001683.hg.1 | 4.41 | NRG4         | neuregulin 4                                                                           |
| TC0X001370.hg.1 | 4.35 | MBNL3        | muscleblind-like splicing regulator 3                                                  |
| TC05001614.hg.1 | 4.34 | PCSK1        | proprotein convertase subtilisin/kexin type 1                                          |
| TC01003266.hg.1 | 4.33 | S100A4       | S100 calcium binding protein A4                                                        |
| TC11002237.hg.1 | 4.32 | MMP12        | matrix metalloproteinase 12 (macrophage elastase)                                      |
| TC04001370.hg.1 | 4.31 | ABCG2        | ATP-binding cassette, sub-family G (WHITE), member 2                                   |
| TC11000876.hg.1 | 4.25 | PRSS23       | protease, serine, 23                                                                   |
| TC05001947.hg.1 | 4.14 | ANXA6        | annexin A6                                                                             |
| TC19001018.hg.1 | 4.14 | BTBD2        | BTB (POZ) domain containing 2                                                          |
| TC16000872.hg.1 | 4.13 | ZC3H7A       | zinc finger CCCH-type containing 7A                                                    |
| TC09000323.hg.1 | 4.12 | MAMDC2       | MAM domain containing 2                                                                |
| TC05000697.hg.1 | 4.12 | KIF20A       | kinesin family member 20A                                                              |
| TC07000463.hg.1 | 4.09 | GATSL1       | GATS protein-like 1                                                                    |
| TC06000178.hg.1 | 4.04 | HIST1H2BI    | histone cluster 1, H2bi                                                                |
| TC01000892.hg.1 | 3.99 | PALMD        | palmdelphin                                                                            |
| TC01001748.hg.1 | 3.97 | CAMK1G       | calcium/calmodulin-dependent protein kinase IG                                         |
| TC01000895.hg.1 | 3.93 | AGL          | amylo-alpha-1, 6-glucosidase, 4-alpha-glucanotransferase                               |
| TC08000602.hg.1 | 3.89 | POP1         | processing of precursor 1, ribonuclease P/MRP subunit (S. cerevisiae)                  |
| TC19001101.hg.1 | 3.88 | CD70         | CD70 molecule                                                                          |
| TC03001456.hg.1 | 3.83 | NT5DC2       | 5'-nucleotidase domain containing 2                                                    |
| TC20000816.hg.1 | 3.81 | NDRG3        | NDRG family member 3                                                                   |
| TC11000773.hg.1 | 3.80 | P2RY6        | pyrimidinergic receptor P2Y, G-protein coupled, 6                                      |
| TC01001900.hg.1 | 3.80 | RAB4A        | RAB4A, member RAS oncogene family                                                      |
| TC20000416.hg.1 | 3.75 | TSHZ2        | teashirt zinc finger homeobox 2                                                        |
| TC04001820.hg.1 | 3.75 | SORBS2       | sorbin and SH3 domain containing 2                                                     |
| TC19001045.hg.1 | 3.73 | MFSD12       | major facilitator superfamily domain containing 12                                     |

|                 |      |           |                                                               |
|-----------------|------|-----------|---------------------------------------------------------------|
| TC09000330.hg.1 | 3.71 | GDA       | guanine deaminase                                             |
| TC10000089.hg.1 | 3.70 | DHTKD1    | dehydrogenase E1 and transketolase domain containing 1        |
| TC0X001518.hg.1 | 3.70 | IDH3G     | isocitrate dehydrogenase 3 (NAD+) gamma                       |
| TC02002765.hg.1 | 3.67 | TNS1      | tensin 1                                                      |
| TC03002034.hg.1 | 3.66 | ZMAT3     | zinc finger, matrin-type 3                                    |
| TC07003339.hg.1 | 3.66 | CAV1      | caveolin 1, caveolae protein, 22kDa                           |
| TC05000004.hg.1 | 3.66 | SDHA      | succinate dehydrogenase complex, subunit A, flavoprotein (Fp) |
| TC02001246.hg.1 | 3.63 | CPS1      | carbamoyl-phosphate synthase 1, mitochondrial                 |
| TC03003359.hg.1 | 3.62 | GXYLT2    | glucoside xylosyltransferase 2                                |
| TC05001742.hg.1 | 3.62 | ALDH7A1   | aldehyde dehydrogenase 7 family, member A1                    |
| TC06001879.hg.1 | 3.62 | COL12A1   | collagen, type XII, alpha 1                                   |
| TC07002083.hg.1 | 3.59 | NCAPG2    | non-SMC condensin II complex, subunit G2                      |
| TC17000535.hg.1 | 3.53 | VPS25     | vacuolar protein sorting 25 homolog (S. cerevisiae)           |
| TC14002318.hg.1 | 3.52 | HEATR5A   | HEAT repeat containing 5A                                     |
| TC16000063.hg.1 | 3.46 | TRAF7     | TNF receptor-associated factor 7, E3 ubiquitin protein ligase |
| TC08001086.hg.1 | 3.45 | PBK       | PDZ binding kinase                                            |
| TC17000777.hg.1 | 3.44 | MILR1     | mast cell immunoglobulin-like receptor 1                      |
| TC03001978.hg.1 | 3.44 | GOLIM4    | golgi integral membrane protein 4                             |
| TC17000970.hg.1 | 3.44 | ABR       | active BCR-related                                            |
| TC11001509.hg.1 | 3.43 | LGR4      | leucine-rich repeat containing G protein-coupled receptor 4   |
| TC19001922.hg.1 | 3.42 | CHMP2A    | charged multivesicular body protein 2A                        |
| TC07001904.hg.1 | 3.37 | SVOP      | SVOP-like                                                     |
| TC02002733.hg.1 | 3.34 | LANCL1    | LanC lantibiotic synthetase component C-like 1 (bacterial)    |
| TC14001364.hg.1 | 3.33 | DIO2      | deiodinase, iodothyronine, type II                            |
| TC0X000681.hg.1 | 3.32 | HNRNPA3P3 | heterogeneous nuclear ribonucleoprotein A3 pseudogene 3       |
| TC03000419.hg.1 | 3.31 | MITF      | microphthalmia-associated transcription factor                |
| TC14001538.hg.1 | 3.29 | CKB       | creatine kinase, brain                                        |
| TC20000531.hg.1 | 3.29 | PRPF6     | PRP6 pre-mRNA processing factor 6 homolog (S. cerevisiae)     |
| TC19000720.hg.1 | 3.28 | RUVBL2    | RuvB-like 2 (E. coli)                                         |
| TC04000833.hg.1 | 3.27 | TLL1      | tolloid-like 1                                                |
| TC04001344.hg.1 | 3.22 | PLAC8     | placenta-specific 8                                           |
| TC19000340.hg.1 | 3.21 | GLT25D1   | glycosyltransferase 25 domain containing 1                    |
| TC01000261.hg.1 | 3.19 | CDA       | cytidine deaminase                                            |
| TC01000872.hg.1 | 3.18 | ABCD3     | ATP-binding cassette, sub-family D (ALD), member 3            |
| TC12001605.hg.1 | 3.17 | TIMELESS  | timeless homolog (Drosophila)                                 |
| TC07003360.hg.1 | 3.14 | GATSL2    | GATS protein-like 2                                           |
| TC17000958.hg.1 | 3.11 | TBCD      | tubulin folding cofactor D                                    |
| TC06001341.hg.1 | 3.11 | HIST1H4B  | histone cluster 1, H4b                                        |
| TC20000335.hg.1 | 3.11 | WISP2     | WNT1 inducible signaling pathway protein 2                    |
| TC17000999.hg.1 | 3.10 | KIAA0664  | KIAA0664                                                      |
| TC0X000572.hg.1 | 3.08 | WDR44     | WD repeat domain 44                                           |
| TC07000437.hg.1 | 3.08 | GTF2IP1   | general transcription factor Ili, pseudogene 1                |

|                          |      |           |                                                                       |
|--------------------------|------|-----------|-----------------------------------------------------------------------|
| TC17001520.hg.1          | 3.08 | ACLY      | ATP citrate lyase                                                     |
| TC19001275.hg.1          | 3.07 | BST2      | bone marrow stromal cell antigen 2                                    |
| TC06000658.hg.1          | 3.07 | TMEM14A   | transmembrane protein 14A                                             |
| TC6_ssto_hap7000143.hg.1 | 3.07 | VARs      | valyl-tRNA synthetase                                                 |
| TC02001750.hg.1          | 3.05 | CYP1B1    | cytochrome P450, family 1, subfamily B, polypeptide 1                 |
| TC03000297.hg.1          | 3.05 | APEH      | N-acylaminoacyl-peptide hydrolase                                     |
| TC17000098.hg.1          | 3.04 | POLR2A    | polymerase (RNA) II (DNA directed) polypeptide A, 220kDa              |
| TC03001583.hg.1          | 3.04 | VGLL3     | vestigial like 3 (Drosophila)                                         |
| TC10001702.hg.1          | 3.04 | PRDX3     | peroxiredoxin 3                                                       |
| TC13000715.hg.1          | 3.02 | HNRNPA3P5 | heterogeneous nuclear ribonucleoprotein A3 pseudogene 5               |
| TC01001607.hg.1          | 3.02 | PLA2G4A   | phospholipase A2, group IVA (cytosolic, calcium-dependent)            |
| TC16001343.hg.1          | 3.01 | PIEZO1    | piezo-type mechanosensitive ion channel component 1                   |
| TC20000810.hg.1          | 3.00 | LOC647979 | uncharacterized LOC647979                                             |
| TC19002646.hg.1          | 3.00 | PRMT1     | protein arginine methyltransferase 1                                  |
| TC0X000118.hg.1          | 2.99 | PK3       | pyruvate dehydrogenase kinase, isozyme 3                              |
| TC07002027.hg.1          | 2.99 | CDK5      | cyclin-dependent kinase 5                                             |
| TC11000677.hg.1          | 2.98 | C11orf86  | chromosome 11 open reading frame 86                                   |
| TC17000954.hg.1          | 2.98 | FOXK2     | forkhead box K2                                                       |
| TC0X000495.hg.1          | 2.95 | WBP5      | WW domain binding protein 5                                           |
| TC12000521.hg.1          | 2.94 | LRP1      | low density lipoprotein receptor-related protein 1                    |
| TC02000057.hg.1          | 2.94 | RRM2      | ribonucleotide reductase M2                                           |
| TC17001311.hg.1          | 2.94 | FLOT2     | flotillin 2                                                           |
| TC07000562.hg.1          | 2.92 | PEG10     | paternally expressed 10                                               |
| TC19000012.hg.1          | 2.90 | FSTL3     | follicle-stimulating-like 3 (secreted glycoprotein)                   |
| TC03002154.hg.1          | 2.90 | SDHAP1    | succinate dehydrogenase complex, subunit A, flavoprotein pseudogene 1 |
| TC0X001303.hg.1          | 2.89 | KLHL13    | kelch-like 13 (Drosophila)                                            |
| TC06000265.hg.1          | 2.88 | HIST1H2BM | histone cluster 1, H2bm                                               |
| TC02000259.hg.1          | 2.87 | PKDCC     | protein kinase domain containing, cytoplasmic homolog (mouse)         |
| TC0Y000182.hg.1          | 2.86 | CD24      | CD24 molecule                                                         |
| TC0X002307.hg.1          | 2.86 | L1CAM     | L1 cell adhesion molecule                                             |
| TC0X002316.hg.1          | 2.84 | HNRNPH2   | heterogeneous nuclear ribonucleoprotein H2 (H')                       |
| TC11000482.hg.1          | 2.84 | FAM111B   | family with sequence similarity 111, member B                         |
| TC06000762.hg.1          | 2.84 | BCKDHB    | branched chain keto acid dehydrogenase E1, beta polypeptide           |
| TC06001354.hg.1          | 2.81 | HIST1H3G  | histone cluster 1, H3g                                                |
| TC10000350.hg.1          | 2.81 | DKK1      | dickkopf 1 homolog (Xenopus laevis)                                   |
| TC06001345.hg.1          | 2.81 | HIST1H1C  | histone cluster 1, H1c                                                |
| TC06001342.hg.1          | 2.80 | HIST1H3B  | histone cluster 1, H3b                                                |
| TC19000747.hg.1          | 2.79 | AP2A1     | adaptor-related protein complex 2, alpha 1 subunit                    |
| TC11002092.hg.1          | 2.78 | ARRB1     | arrestin, beta 1                                                      |
| TC0X001237.hg.1          | 2.77 | TCEAL8    | transcription elongation factor A (SII)-like 8                        |
| TC17001745.hg.1          | 2.77 | SKA2      | spindle and kinetochore associated complex subunit 2                  |
| TC01003392.hg.1          | 2.77 | TAGLN2    | transgelin 2                                                          |

|                         |      |           |                                                                                                      |
|-------------------------|------|-----------|------------------------------------------------------------------------------------------------------|
| TC19000117.hg.1         | 2.76 | TNFSF9    | tumor necrosis factor (ligand) superfamily, member 9                                                 |
| TC02001062.hg.1         | 2.75 | HNRNPA3   | heterogeneous nuclear ribonucleoprotein A3                                                           |
| TC03000295.hg.1         | 2.75 | DAG1      | dystroglycan 1 (dystrophin-associated glycoprotein 1)                                                |
| TC19001659.hg.1         | 2.75 | TMEM160   | transmembrane protein 160                                                                            |
| TC08000353.hg.1         | 2.74 | C8orf22   | chromosome 8 open reading frame 22                                                                   |
| TC07001363.hg.1         | 2.73 | TNS3      | tensin 3                                                                                             |
| TC0X001182.hg.1         | 2.73 | BRWD3     | bromodomain and WD repeat domain containing 3                                                        |
| TC02002826.hg.1         | 2.73 | CUL3      | cullin 3                                                                                             |
| TC01000776.hg.1         | 2.72 | ACADM     | acyl-CoA dehydrogenase, C-4 to C-12 straight chain                                                   |
| TC10000406.hg.1         | 2.72 | TET1      | tet methylcytosine dioxygenase 1                                                                     |
| TC07001084.hg.1         | 2.72 | INTS1     | integrator complex subunit 1                                                                         |
| TC16000554.hg.1         | 2.71 | SLC7A6    | solute carrier family 7 (amino acid transporter light chain, y+L system), member 6                   |
| TC11001251.hg.1         | 2.70 | POLR2L    | polymerase (RNA) II (DNA directed) polypeptide L, 7.6kDa                                             |
| TC0X000092.hg.1         | 2.69 | PDHA1     | pyruvate dehydrogenase (lipoamide) alpha 1                                                           |
| TC14001023.hg.1         | 2.69 | SPTSSA    | serine palmitoyltransferase, small subunit A                                                         |
| TC03001087.hg.1         | 2.68 | SDHAP2    | succinate dehydrogenase complex, subunit A, flavoprotein pseudogene 2                                |
| TC16000656.hg.1         | 2.68 | WFDC1     | WAP four-disulfide core domain 1                                                                     |
| TC14002292.hg.1         | 2.66 | PABPN1    | poly(A) binding protein, nuclear 1                                                                   |
| TC10001238.hg.1         | 2.66 | LOC728643 | heterogeneous nuclear ribonucleoprotein A1 pseudogene                                                |
| TC16000822.hg.1         | 2.65 | TRAP1     | TNF receptor-associated protein 1                                                                    |
| TC07000517.hg.1         | 2.65 | HNRNPA1P8 | heterogeneous nuclear ribonucleoprotein A1 pseudogene 8                                              |
| TC16000731.hg.1         | 2.64 | C16orf13  | chromosome 16 open reading frame 13                                                                  |
| TC19001003.hg.1         | 2.64 | GAMT      | guanidinoacetate N-methyltransferase                                                                 |
| TC18000480.hg.1         | 2.64 | ATP5A1    | ATP synthase, H <sup>+</sup> transporting, mitochondrial F1 complex, alpha subunit 1, cardiac muscle |
| TC17001973.hg.1         | 2.63 | FASN      | fatty acid synthase                                                                                  |
| TC03001693.hg.1         | 2.63 | RABL3     | RAB, member of RAS oncogene family-like 3                                                            |
| TC11000691.hg.1         | 2.63 | RPS6KB2   | ribosomal protein S6 kinase, 70kDa, polypeptide 2                                                    |
| TC22000385.hg.1         | 2.62 | ATXN10    | ataxin 10                                                                                            |
| TC6_cox_hap2000171.hg.1 | 2.62 | VARs      | valyl-tRNA synthetase                                                                                |
| TC06001543.hg.1         | 2.62 | VARs      | valyl-tRNA synthetase                                                                                |
| TC15000350.hg.1         | 2.62 | SORD      | sorbitol dehydrogenase                                                                               |
| TC10000377.hg.1         | 2.61 | ARID5B    | AT rich interactive domain 5B (MRF1-like)                                                            |
| TC17000120.hg.1         | 2.61 | CHD3      | chromodomain helicase DNA binding protein 3                                                          |
| TC01000659.hg.1         | 2.60 | LRRC42    | leucine rich repeat containing 42                                                                    |
| TC05000809.hg.1         | 2.60 | SPINK13   | serine peptidase inhibitor, Kazal type 13 (putative)                                                 |
| TC12000725.hg.1         | 2.60 | MRPL42    | mitochondrial ribosomal protein L42                                                                  |
| TC01002578.hg.1         | 2.58 | SLC2A1    | solute carrier family 2 (facilitated glucose transporter), member 1                                  |
| TC6_dbb_hap3000160.hg.1 | 2.57 | VARs      | valyl-tRNA synthetase                                                                                |
| TC0X000382.hg.1         | 2.57 | MED12     | mediator complex subunit 12                                                                          |
| TC03001188.hg.1         | 2.57 | NUP210    | nucleoporin 210kDa                                                                                   |
| TC19000010.hg.1         | 2.57 | HCN2      | hyperpolarization activated cyclic nucleotide-gated potassium channel 2                              |



|                             |      |           |                                                                                                         |
|-----------------------------|------|-----------|---------------------------------------------------------------------------------------------------------|
| TC6_apd_hap1000<br>085.hg.1 | 2.56 | VARs      | valyl-tRNA synthetase                                                                                   |
| TC6_mcf_hap5000<br>148.hg.1 | 2.56 | VARs      | valyl-tRNA synthetase                                                                                   |
| TC14001560.hg.1             | 2.56 | AKT1      | v-akt murine thymoma viral oncogene homolog 1                                                           |
| TC01002864.hg.1             | 2.56 | TGFR3     | transforming growth factor, beta receptor III                                                           |
| TC17001118.hg.1             | 2.55 | MYH10     | myosin, heavy chain 10, non-muscle                                                                      |
| TC0X001184.hg.1             | 2.54 | HMGN5     | high mobility group nucleosome binding domain 5                                                         |
| TC20000316.hg.1             | 2.54 | SRSF6     | serine/arginine-rich splicing factor 6                                                                  |
| TC06000171.hg.1             | 2.54 | HIST1H2BF | histone cluster 1, H2bf                                                                                 |
| TC0X000628.hg.1             | 2.53 | MST4      | serine/threonine protein kinase MST4                                                                    |
| TC01003194.hg.1             | 2.53 | HIST2H2AB | histone cluster 2, H2ab                                                                                 |
| TC01000931.hg.1             | 2.53 | FAM102B   | family with sequence similarity 102, member B                                                           |
| TC01001732.hg.1             | 2.53 | C4BPB     | complement component 4 binding protein, beta                                                            |
| TC02000141.hg.1             | 2.53 | EFR3B     | EFR3 homolog B ( <i>S. cerevisiae</i> )                                                                 |
| TC05000453.hg.1             | 2.53 | ANKRD32   | ankyrin repeat domain 32                                                                                |
| TC17000085.hg.1             | 2.52 | ACADVL    | acyl-CoA dehydrogenase, very long chain                                                                 |
| TC01003200.hg.1             | 2.52 | ANP32E    | acidic (leucine-rich) nuclear phosphoprotein 32<br>family, member E                                     |
| TC14000914.hg.1             | 2.51 | LOC283624 | uncharacterized LOC283624                                                                               |
| TC20000876.hg.1             | 2.51 | SLPI      | secretory leukocyte peptidase inhibitor                                                                 |
| TC15000580.hg.1             | 2.51 | LACTB     | lactamase, beta                                                                                         |
| TC03000053.hg.1             | 2.51 | BRK1      | BRICK1, SCAR/WAVE actin-nucleating complex<br>subunit                                                   |
| TC03001019.hg.1             | 2.51 | DNAJB11   | DnaJ (Hsp40) homolog, subfamily B, member 11                                                            |
| TC12001330.hg.1             | 2.50 | ASUN      | asunder, spermatogenesis regulator homolog<br>( <i>Drosophila</i> )                                     |
| TC01002328.hg.1             | 2.50 | HSPG2     | heparan sulfate proteoglycan 2                                                                          |
| TC19001076.hg.1             | 2.49 | PTPRS     | protein tyrosine phosphatase, receptor type, S                                                          |
| TC02000310.hg.1             | 2.48 | CHAC2     | ChaC, cation transport regulator homolog 2 ( <i>E. coli</i> )                                           |
| TC07001617.hg.1             | 2.48 | PON2      | paraoxonase 2                                                                                           |
| TC21000222.hg.1             | 2.47 | PFKL      | phosphofructokinase, liver                                                                              |
| TC19000067.hg.1             | 2.47 | NCLN      | nicalin                                                                                                 |
| TC17000633.hg.1             | 2.47 | ATP5G1    | ATP synthase, H <sup>+</sup> transporting, mitochondrial Fo<br>complex, subunit C1 (subunit 9)          |
| TC17001579.hg.1             | 2.47 | SLC25A39  | solute carrier family 25, member 39                                                                     |
| TC16001083.hg.1             | 2.47 | SHCBP1    | SHC SH2-domain binding protein 1                                                                        |
| TC19001029.hg.1             | 2.47 | TIMM13    | translocase of inner mitochondrial membrane 13<br>homolog (yeast)                                       |
| TC11000133.hg.1             | 2.47 | ILK       | integrin-linked kinase                                                                                  |
| TC16000217.hg.1             | 2.46 | IQCK      | IQ motif containing K                                                                                   |
| TC15002807.hg.1             | 2.46 | KIAA0101  | KIAA0101                                                                                                |
| TC17000147.hg.1             | 2.46 | GLP2R     | glucagon-like peptide 2 receptor                                                                        |
| TC18000104.hg.1             | 2.46 | TTC39C    | tetratricopeptide repeat domain 39C                                                                     |
| TC0X001353.hg.1             | 2.46 | SMARCA1   | SWI/SNF related, matrix associated, actin<br>dependent regulator of chromatin, subfamily a,<br>member 1 |
| TC01001463.hg.1             | 2.46 | DCAF6     | DDB1 and CUL4 associated factor 6                                                                       |
| TC06001426.hg.1             | 2.44 | HIST1H1B  | histone cluster 1, H1b                                                                                  |
| TC11002427.hg.1             | 2.44 | CDON      | Cdon homolog (mouse)                                                                                    |
| TC06001896.hg.1             | 2.44 | HMGN3     | high mobility group nucleosomal binding domain                                                          |

|                 |      |            |                                                                                       |
|-----------------|------|------------|---------------------------------------------------------------------------------------|
| TC15000455.hg.1 | 2.43 | FAM81A     | family with sequence similarity 81, member A                                          |
| TC09000624.hg.1 | 2.43 | SKA2L      | spindle and kinetochore associated complex subunit 2-like                             |
| TC15000864.hg.1 | 2.43 | IQGAP1     | IQ motif containing GTPase activating protein 1                                       |
| TC10000946.hg.1 | 2.42 | INPP5A     | inositol polyphosphate-5-phosphatase, 40kDa                                           |
| TC01004027.hg.1 | 2.42 | CHML       | choroideremia-like (Rab escort protein 2)                                             |
| TC02001401.hg.1 | 2.42 | PRSS56     | protease, serine, 56                                                                  |
| TC11001102.hg.1 | 2.41 | ARHGEF12   | Rho guanine nucleotide exchange factor (GEF) 12                                       |
| TC03000012.hg.1 | 2.41 | SETMAR     | SET domain and mariner transposase fusion gene                                        |
| TC19001233.hg.1 | 2.40 | LPHN1      | latrophilin 1                                                                         |
| TC03001482.hg.1 | 2.40 | WNT5A      | wingless-type MMTV integration site family, member 5A                                 |
| TC11001976.hg.1 | 2.40 | PC         | pyruvate carboxylase                                                                  |
| TC06001349.hg.1 | 2.39 | HIST1H3D   | histone cluster 1, H3d                                                                |
| TC09001012.hg.1 | 2.39 | AQP3       | aquaporin 3 (Gill blood group)                                                        |
| TC12000495.hg.1 | 2.39 | DGKA       | diacylglycerol kinase, alpha 80kDa                                                    |
| TC0X000423.hg.1 | 2.38 | COX7B      | cytochrome c oxidase subunit VIIb                                                     |
| TC01002340.hg.1 | 2.37 | HNRNPR     | heterogeneous nuclear ribonucleoprotein R                                             |
| TC14001101.hg.1 | 2.36 | RPL36AL    | ribosomal protein L36a-like                                                           |
| TC05001788.hg.1 | 2.36 | CDKN2AIPNL | CDKN2A interacting protein N-terminal like                                            |
| TC07000235.hg.1 | 2.36 | ANLN       | anillin, actin binding protein                                                        |
| TC10001136.hg.1 | 2.35 | MPP7       | membrane protein, palmitoylated 7 (MAGUK p55 subfamily member 7)                      |
| TC10000813.hg.1 | 2.35 | ACSL5      | acyl-CoA synthetase long-chain family member 5                                        |
| TC06001425.hg.1 | 2.35 | HIST1H2AK  | histone cluster 1, H2ak                                                               |
| TC08001264.hg.1 | 2.35 | ASPH       | aspartate beta-hydroxylase                                                            |
| TC22000198.hg.1 | 2.35 | NEFH       | neurofilament, heavy polypeptide                                                      |
| TC11000592.hg.1 | 2.35 | PLCB3      | phospholipase C, beta 3 (phosphatidylinositol-specific)                               |
| TC19001721.hg.1 | 2.34 | RRAS       | related RAS viral (r-ras) oncogene homolog                                            |
| TC12002016.hg.1 | 2.34 | WSB2       | WD repeat and SOCS box containing 2                                                   |
| TC19001618.hg.1 | 2.34 | ERCC2      | excision repair cross-complementing rodent repair deficiency, complementation group 2 |
| TC03000077.hg.1 | 2.34 | FBLN2      | fibulin 2                                                                             |
| TC17001905.hg.1 | 2.33 | MXRA7      | matrix-remodelling associated 7                                                       |
| TC07000458.hg.1 | 2.33 | GTF2I      | general transcription factor Iii                                                      |
| TC17001561.hg.1 | 2.33 | MEOX1      | mesenchyme homeobox 1                                                                 |
| TC14000346.hg.1 | 2.33 | PSMA3      | proteasome (prosome, macropain) subunit, alpha type, 3                                |
| TC10000797.hg.1 | 2.33 | ADD3       | adducin 3 (gamma)                                                                     |
| TC22001426.hg.1 | 2.32 | APOBEC3C   | apolipoprotein B mRNA editing enzyme, catalytic polypeptide-like 3C                   |
| TC02002516.hg.1 | 2.32 | HMGB1P4    | high mobility group box 1 pseudogene 4                                                |
| TC17001914.hg.1 | 2.32 | TK1        | thymidine kinase 1, soluble                                                           |
| TC0X000783.hg.1 | 2.32 | BRCC3      | BRCA1/BRCA2-containing complex, subunit 3                                             |
| TC05000096.hg.1 | 2.31 | BASP1      | brain abundant, membrane attached signal protein 1                                    |
| TC03001866.hg.1 | 2.31 | PLOD2      | procollagen-lysine, 2-oxoglutarate 5-dioxygenase 2                                    |
| TC11000657.hg.1 | 2.31 | RAB1B      | RAB1B, member RAS oncogene family                                                     |

|                 |      |           |                                                                                                                                                     |
|-----------------|------|-----------|-----------------------------------------------------------------------------------------------------------------------------------------------------|
| TC11002269.hg.1 | 2.31 | EXPH5     | exophilin 5                                                                                                                                         |
| TC10000715.hg.1 | 2.31 | ABCC2     | ATP-binding cassette, sub-family C (CFTR/MRP), member 2                                                                                             |
| TC06002301.hg.1 | 2.30 | SDIM1     | stress responsive DNAJB4 interacting membrane protein 1                                                                                             |
| TC03000583.hg.1 | 2.30 | ATP6V1A   | ATPase, H <sup>+</sup> transporting, lysosomal 70kDa, V1 subunit A                                                                                  |
| TC09001009.hg.1 | 2.30 | BAG1      | BCL2-associated athanogene                                                                                                                          |
| TC06000173.hg.1 | 2.29 | HIST1H2AE | histone cluster 1, H2ae                                                                                                                             |
| TC19000180.hg.1 | 2.29 | SLC44A2   | solute carrier family 44, member 2                                                                                                                  |
| TC03000120.hg.1 | 2.29 | HMGB1P5   | high mobility group box 1 pseudogene 5                                                                                                              |
| TC04001797.hg.1 | 2.29 | RWDD4     | RWD domain containing 4                                                                                                                             |
| TC11002473.hg.1 | 2.28 | NCAPD3    | non-SMC condensin II complex, subunit D3                                                                                                            |
| TC06001844.hg.1 | 2.28 | LGSN      | lengsin, lens protein with glutamine synthetase domain                                                                                              |
| TC05000144.hg.1 | 2.28 | NPR3      | natriuretic peptide receptor C/guanylate cyclase C (atrionatriuretic peptide receptor C)                                                            |
| TC02004919.hg.1 | 2.28 | HOXD10    | homeobox D10                                                                                                                                        |
| TC02002033.hg.1 | 2.27 | SUCLG1    | succinate-CoA ligase, alpha subunit                                                                                                                 |
| TC10001790.hg.1 | 2.27 | ECHS1     | enoyl CoA hydratase, short chain, 1, mitochondrial                                                                                                  |
| TC09002905.hg.1 | 2.27 | NIPSNAP3A | nipsnap homolog 3A (C. elegans)                                                                                                                     |
| TC06004064.hg.1 | 2.27 | HIST1H3H  | histone cluster 1, H3h                                                                                                                              |
| TC12001792.hg.1 | 2.27 | KITLG     | KIT ligand                                                                                                                                          |
| TC19000057.hg.1 | 2.27 | THOP1     | thimet oligopeptidase 1                                                                                                                             |
| TC02001742.hg.1 | 2.27 | PRKD3     | protein kinase D3                                                                                                                                   |
| TC06001386.hg.1 | 2.26 | HIST1H2BJ | histone cluster 1, H2bj                                                                                                                             |
| TC19001874.hg.1 | 2.26 | ISOC2     | isochorismatase domain containing 2                                                                                                                 |
| TC02000168.hg.1 | 2.26 | CAD       | carbamoyl-phosphate synthetase 2, aspartate transcarbamylase, and dihydroorotase                                                                    |
| TC06002106.hg.1 | 2.26 | EPB41L2   | erythrocyte membrane protein band 4.1-like 2                                                                                                        |
| TC13000876.hg.1 | 2.26 | CARS2     | cysteinyI-tRNA synthetase 2, mitochondrial (putative)                                                                                               |
| TC06004063.hg.1 | 2.25 | HIST1H2AI | histone cluster 1, H2ai                                                                                                                             |
| TC12000926.hg.1 | 2.25 | PEBP1     | phosphatidylethanolamine binding protein 1                                                                                                          |
| TC03001570.hg.1 | 2.25 | ROBO1     | roundabout, axon guidance receptor, homolog 1 (Drosophila)                                                                                          |
| TC12000804.hg.1 | 2.25 | TDG       | thymine-DNA glycosylase                                                                                                                             |
| TC13000344.hg.1 | 2.24 | FARP1     | FERM, RhoGEF (ARHGEF) and pleckstrin domain protein 1 (chondrocyte-derived)                                                                         |
| TC17001937.hg.1 | 2.24 | NPTX1     | neuronal pentraxin I                                                                                                                                |
| TC20000082.hg.1 | 2.24 | SNAP25    | synaptosomal-associated protein, 25kDa                                                                                                              |
| TC14000388.hg.1 | 2.24 | MTHFD1    | methylenetetrahydrofolate dehydrogenase (NADP <sup>+</sup> dependent) 1, methenyltetrahydrofolate cyclohydrolase, formyltetrahydrofolate synthetase |
| TC19000496.hg.1 | 2.23 | CAPNS1    | calpain, small subunit 1                                                                                                                            |
| TC11000464.hg.1 | 2.23 | RTN4RL2   | reticulon 4 receptor-like 2                                                                                                                         |
| TC06000909.hg.1 | 2.23 | MARCKS    | myristoylated alanine-rich protein kinase C substrate                                                                                               |
| TC19000681.hg.1 | 2.22 | EHD2      | EH-domain containing 2                                                                                                                              |
| TC05000622.hg.1 | 2.22 | LYRM7     | Lym7 homolog (mouse)                                                                                                                                |
| TC22000202.hg.1 | 2.22 | UQCR10    | ubiquinol-cytochrome c reductase, complex III subunit X                                                                                             |
| TC14000418.hg.1 | 2.22 | SRSF5     | serine/arginine-rich splicing factor 5                                                                                                              |

|                 |      |           |                                                                                   |
|-----------------|------|-----------|-----------------------------------------------------------------------------------|
| TC12003254.hg.1 | 2.21 | TMEM19    | transmembrane protein 19                                                          |
| TC19001298.hg.1 | 2.21 | TMEM161A  | transmembrane protein 161A                                                        |
| TC03000631.hg.1 | 2.21 | FAM162A   | family with sequence similarity 162, member A                                     |
| TC14000810.hg.1 | 2.20 | TDRD9     | tudor domain containing 9                                                         |
| TC17000772.hg.1 | 2.20 | PSMC5     | proteasome (prosome, macropain) 26S subunit, ATPase, 5                            |
| TC09000968.hg.1 | 2.20 | ELAVL2    | ELAV (embryonic lethal, abnormal vision, Drosophila)-like 2 (Hu antigen B)        |
| TC01006285.hg.1 | 2.20 | GSTM4     | glutathione S-transferase mu 4                                                    |
| TC11000856.hg.1 | 2.20 | PCF11     | PCF11, cleavage and polyadenylation factor subunit, homolog (S. cerevisiae)       |
| TC01002412.hg.1 | 2.19 | IFI6      | interferon, alpha-inducible protein 6                                             |
| TC06000176.hg.1 | 2.19 | HIST1H2BH | histone cluster 1, H2bh                                                           |
| TC11000036.hg.1 | 2.19 | AP2A2     | adaptor-related protein complex 2, alpha 2 subunit                                |
| TC02002378.hg.1 | 2.19 | CXCR4     | chemokine (C-X-C motif) receptor 4                                                |
| TC01000977.hg.1 | 2.18 | ATP5F1    | ATP synthase, H <sup>+</sup> transporting, mitochondrial Fo complex, subunit B1   |
| TC06001027.hg.1 | 2.18 | TNFAIP3   | tumor necrosis factor, alpha-induced protein 3                                    |
| TC01000733.hg.1 | 2.18 | PDE4B     | phosphodiesterase 4B, cAMP-specific                                               |
| TC03000518.hg.1 | 2.18 | TRMT10C   | tRNA methyltransferase 10 homolog C (S. cerevisiae)                               |
| TC17001098.hg.1 | 2.18 | TRAPPC1   | trafficking protein particle complex 1                                            |
| TC13000192.hg.1 | 2.18 | PSME2P2   | proteasome activator subunit 2 pseudogene 2                                       |
| TC21000511.hg.1 | 2.18 | MYL6P1    | myosin, light chain 6 pseudogene 1                                                |
| TC08000538.hg.1 | 2.18 | WWP1      | WW domain containing E3 ubiquitin protein ligase 1                                |
| TC02000041.hg.1 | 2.18 | ID2       | inhibitor of DNA binding 2, dominant negative helix-loop-helix protein            |
| TC01000492.hg.1 | 2.17 | NDUFS5    | NADH dehydrogenase (ubiquinone) Fe-S protein 5, 15kDa (NADH-coenzyme Q reductase) |
| TC06001430.hg.1 | 2.17 | HIST1H2AM | histone cluster 1, H2am                                                           |
| TC13000662.hg.1 | 2.17 | EBPL      | emopamil binding protein-like                                                     |
| TC19001703.hg.1 | 2.16 | GYS1      | glycogen synthase 1 (muscle)                                                      |
| TC09000500.hg.1 | 2.16 | TGFBR1    | transforming growth factor, beta receptor 1                                       |
| TC11001873.hg.1 | 2.16 | GANAB     | glucosidase, alpha; neutral AB                                                    |
| TC07003350.hg.1 | 2.16 | KDELRL2   | KDEL (Lys-Asp-Glu-Leu) endoplasmic reticulum protein retention receptor 2         |
| TC0X001491.hg.1 | 2.15 | GABRE     | gamma-aminobutyric acid (GABA) A receptor, epsilon                                |
| TC19000907.hg.1 | 2.15 | EPN1      | epsin 1                                                                           |
| TC06000153.hg.1 | 2.15 | LRRC16A   | leucine rich repeat containing 16A                                                |
| TC11001173.hg.1 | 2.15 | DCPS      | decapping enzyme, scavenger                                                       |
| TC06001353.hg.1 | 2.15 | HIST1H3F  | histone cluster 1, H3f                                                            |
| TC06001421.hg.1 | 2.15 | HIST1H2BL | histone cluster 1, H2bl                                                           |
| TC12003245.hg.1 | 2.15 | MYL6      | myosin, light chain 6, alkali, smooth muscle and non-muscle                       |
| TC17002886.hg.1 | 2.14 | C17orf61  | chromosome 17 open reading frame 61                                               |
| TC02000751.hg.1 | 2.14 | DBI       | diazepam binding inhibitor (GABA receptor modulator, acyl-CoA binding protein)    |
| TC08000814.hg.1 | 2.14 | LY6E      | lymphocyte antigen 6 complex, locus E                                             |
| TC07001344.hg.1 | 2.14 | TMED4     | transmembrane emp24 protein transport domain containing 4                         |
| TC09001547.hg.1 | 2.14 | STOM      | stomatin                                                                          |
| TC12003295.hg.1 | 2.14 | HOXC4     | homeobox C4                                                                       |

|                         |      |           |                                                                                                |
|-------------------------|------|-----------|------------------------------------------------------------------------------------------------|
| TC03000417.hg.1         | 2.14 | ARL6IP5   | ADP-ribosylation-like factor 6 interacting protein 5                                           |
| TC08000415.hg.1         | 2.13 | KRT8      | keratin 8                                                                                      |
| TC14001455.hg.1         | 2.13 | C14orf142 | chromosome 14 open reading frame 142                                                           |
| TC01002788.hg.1         | 2.13 | CRYZ      | crystallin, zeta (quinone reductase)                                                           |
| TC20000109.hg.1         | 2.13 | DSTN      | destrin (actin depolymerizing factor)                                                          |
| TC17001147.hg.1         | 2.13 | ELAC2     | elaC homolog 2 (E. coli)                                                                       |
| TC02000856.hg.1         | 2.13 | POTEKP    | POTE ankyrin domain family, member K, pseudogene                                               |
| TC12000138.hg.1         | 2.13 | KLRG1     | killer cell lectin-like receptor subfamily G, member 1                                         |
| TC19001774.hg.1         | 2.13 | ETFB      | electron-transfer-flavoprotein, beta polypeptide                                               |
| TC02002695.hg.1         | 2.13 | GCSHP3    | glycine cleavage system protein H (aminomethyl carrier) pseudogene 3                           |
| TC11000979.hg.1         | 2.13 | ACAT1     | acetyl-CoA acetyltransferase 1                                                                 |
| TC02001729.hg.1         | 2.12 | FAM98A    | family with sequence similarity 98, member A                                                   |
| TC10001726.hg.1         | 2.12 | OAT       | ornithine aminotransferase                                                                     |
| TC01002775.hg.1         | 2.12 | ZRANB2    | zinc finger, RAN-binding domain containing 2                                                   |
| TC19000665.hg.1         | 2.12 | CALM3     | calmodulin 3 (phosphorylase kinase, delta)                                                     |
| TC17000315.hg.1         | 2.11 | NLK       | nemo-like kinase                                                                               |
| TC19001253.hg.1         | 2.11 | AKAP8     | A kinase (PRKA) anchor protein 8                                                               |
| TC09000812.hg.1         | 2.11 | PMPCA     | peptidase (mitochondrial processing) alpha                                                     |
| TC6_qbl_hap6000161.hg.1 | 2.11 | VARS      | valyl-tRNA synthetase                                                                          |
| TC01001814.hg.1         | 2.11 | IARS2     | isoleucyl-tRNA synthetase 2, mitochondrial                                                     |
| TC17001301.hg.1         | 2.11 | ALDOC     | aldolase C, fructose-bisphosphate                                                              |
| TC05001307.hg.1         | 2.11 | OXCT1     | 3-oxoacid CoA transferase 1                                                                    |
| TC07000111.hg.1         | 2.11 | TSPAN13   | tetraspanin 13                                                                                 |
| TC19000532.hg.1         | 2.11 | ACTN4     | actinin, alpha 4                                                                               |
| TC12002087.hg.1         | 2.11 | SBNO1     | strawberry notch homolog 1 (Drosophila)                                                        |
| TC01001435.hg.1         | 2.10 | PBX1      | pre-B-cell leukemia homeobox 1                                                                 |
| TC20000821.hg.1         | 2.10 | SAMHD1    | SAM domain and HD domain 1                                                                     |
| TC22000142.hg.1         | 2.10 | GSTT2     | glutathione S-transferase theta 2                                                              |
| TC09000731.hg.1         | 2.10 | NCS1      | neuronal calcium sensor 1                                                                      |
| TC11002074.hg.1         | 2.10 | UCP2      | uncoupling protein 2 (mitochondrial, proton carrier)                                           |
| TC22000301.hg.1         | 2.10 | KDEL3     | KDEL (Lys-Asp-Glu-Leu) endoplasmic reticulum protein retention receptor 3                      |
| TC13000524.hg.1         | 2.10 | UBL3      | ubiquitin-like 3                                                                               |
| TC17000698.hg.1         | 2.10 | NOG       | noggin                                                                                         |
| TC11000404.hg.1         | 2.10 | DDB2      | damage-specific DNA binding protein 2, 48kDa                                                   |
| TC17000402.hg.1         | 2.09 | TAF15     | TAF15 RNA polymerase II, TATA box binding protein (TBP)-associated factor, 68kDa               |
| TC12000884.hg.1         | 2.09 | OAS1      | 2'-5'-oligoadenylate synthetase 1, 40/46kDa                                                    |
| TC02002574.hg.1         | 2.09 | FKBP7     | FK506 binding protein 7                                                                        |
| TC16000851.hg.1         | 2.09 | CARHSP1   | calcium regulated heat stable protein 1, 24kDa                                                 |
| TC06001881.hg.1         | 2.08 | TMEM30A   | transmembrane protein 30A                                                                      |
| TC05001112.hg.1         | 2.08 | SDHAP3    | succinate dehydrogenase complex, subunit A, flavoprotein pseudogene 3                          |
| TC04000853.hg.1         | 2.08 | GALNT7    | UDP-N-acetyl-alpha-D-galactosamine:polypeptide N-acetylgalactosaminyltransferase 7 (GalNAc-T7) |
| TC11000696.hg.1         | 2.08 | NDUFV1    | NADH dehydrogenase (ubiquinone) flavoprotein 1, 51kDa                                          |

|                 |      |           |                                                                                     |
|-----------------|------|-----------|-------------------------------------------------------------------------------------|
| TC15000881.hg.1 | 2.08 | SLCO3A1   | solute carrier organic anion transporter family, member 3A1                         |
| TC14001508.hg.1 | 2.08 | SLC25A29  | solute carrier family 25 (mitochondrial carnitine/acylcarnitine carrier), member 29 |
| TC17001056.hg.1 | 2.08 | C1QBP     | complement component 1, q subcomponent binding protein                              |
| TC16000427.hg.1 | 2.08 | PHKB      | phosphorylase kinase, beta                                                          |
| TC12000490.hg.1 | 2.08 | GDF11     | growth differentiation factor 11                                                    |
| TC0X001486.hg.1 | 2.07 | CD99L2    | CD99 molecule-like 2                                                                |
| TC22000580.hg.1 | 2.07 | GSTT2     | glutathione S-transferase theta 2                                                   |
| TC02001354.hg.1 | 2.07 | MRPL44    | mitochondrial ribosomal protein L44                                                 |
| TC17001890.hg.1 | 2.07 | ACOX1     | acyl-CoA oxidase 1, palmitoyl                                                       |
| TC11000707.hg.1 | 2.07 | LRP5      | low density lipoprotein receptor-related protein 5                                  |
| TC07000011.hg.1 | 2.07 | HEATR2    | HEAT repeat containing 2                                                            |
| TC16000062.hg.1 | 2.07 | RAB26     | RAB26, member RAS oncogene family                                                   |
| TC19001210.hg.1 | 2.07 | PRDX2     | peroxiredoxin 2                                                                     |
| TC01002314.hg.1 | 2.06 | CAMK2N1   | calcium/calmodulin-dependent protein kinase II inhibitor 1                          |
| TC15000868.hg.1 | 2.06 | BLM       | Bloom syndrome, RecQ helicase-like                                                  |
| TC02000582.hg.1 | 2.06 | NCAPH     | non-SMC condensin I complex, subunit H                                              |
| TC06000223.hg.1 | 2.06 | HIST1H2AG | histone cluster 1, H2ag                                                             |
| TC01002803.hg.1 | 2.06 | FUBP1     | far upstream element (FUSE) binding protein 1                                       |
| TC02002043.hg.1 | 2.06 | GGCX      | gamma-glutamyl carboxylase                                                          |
| TC22000337.hg.1 | 2.06 | ACO2      | aconitase 2, mitochondrial                                                          |
| TC10000138.hg.1 | 2.05 | CACNB2    | calcium channel, voltage-dependent, beta 2 subunit                                  |
| TC17000060.hg.1 | 2.05 | KIF1C     | kinesin family member 1C                                                            |
| TC17001970.hg.1 | 2.05 | DCXR      | dicarbonyl/L-xylulose reductase                                                     |
| TC01001819.hg.1 | 2.05 | 2-Mar     | mitochondrial amidoxime reducing component 2                                        |
| TC04001376.hg.1 | 2.05 | PIGY      | phosphatidylinositol glycan anchor biosynthesis, class Y                            |
| TC06000225.hg.1 | 2.05 | HIST1H2AH | histone cluster 1, H2ah                                                             |
| TC05000509.hg.1 | 2.05 | FER       | fer (fps/fes related) tyrosine kinase                                               |
| TC02001100.hg.1 | 2.05 | ITGAV     | integrin, alpha V                                                                   |
| TC01003226.hg.1 | 2.05 | SELENBP1  | selenium binding protein 1                                                          |
| TC05000202.hg.1 | 2.04 | NNT       | nicotinamide nucleotide transhydrogenase                                            |
| TC13000119.hg.1 | 2.04 | RFC3      | replication factor C (activator 1) 3, 38kDa                                         |
| TC13000468.hg.1 | 2.04 | SKA3      | spindle and kinetochore associated complex subunit 3                                |
| TC05000161.hg.1 | 2.04 | SKP2      | S-phase kinase-associated protein 2, E3 ubiquitin protein ligase                    |
| TC09001058.hg.1 | 2.04 | TPM2      | tropomyosin 2 (beta)                                                                |
| TC03001067.hg.1 | 2.04 | OPA1      | optic atrophy 1 (autosomal dominant)                                                |
| TC22000285.hg.1 | 2.04 | LGALS1    | lectin, galactoside-binding, soluble, 1                                             |
| TC05000498.hg.1 | 2.03 | PP1P5K2   | diphosphoinositol pentakisphosphate kinase 2                                        |
| TC09001591.hg.1 | 2.03 | MAPKAP1   | mitogen-activated protein kinase associated protein 1                               |
| TC17001820.hg.1 | 2.03 | SLC16A6   | solute carrier family 16, member 6 (monocarboxylic acid transporter 7)              |
| TC0X000425.hg.1 | 2.03 | PGK1      | phosphoglycerate kinase 1                                                           |
| TC07000110.hg.1 | 2.03 | BZW2      | basic leucine zipper and W2 domains 2                                               |
| TC13000599.hg.1 | 2.03 | KBTBD6    | kelch repeat and BTB (POZ) domain containing 6                                      |

|                 |      |           |                                                                                               |
|-----------------|------|-----------|-----------------------------------------------------------------------------------------------|
| TC02001866.hg.1 | 2.03 | PNPT1     | polyribonucleotide nucleotidyltransferase 1                                                   |
| TC10000896.hg.1 | 2.03 | ACADSB    | acyl-CoA dehydrogenase, short/branched chain                                                  |
| TC01003835.hg.1 | 2.03 | BPNT1     | 3'(2'), 5'-bisphosphate nucleotidase 1                                                        |
| TC06001052.hg.1 | 2.03 | PEX3      | peroxisomal biogenesis factor 3                                                               |
| TC11002059.hg.1 | 2.02 | PDE2A     | phosphodiesterase 2A, cGMP-stimulated                                                         |
| TC09001420.hg.1 | 2.02 | MRPL50    | mitochondrial ribosomal protein L50                                                           |
| TC01000151.hg.1 | 2.02 | PLOD1     | procollagen-lysine, 2-oxoglutarate 5-dioxygenase 1                                            |
| TC01003751.hg.1 | 2.02 | NUCKS1    | nuclear casein kinase and cyclin-dependent kinase substrate 1                                 |
| TC05001385.hg.1 | 2.02 | PLK2      | polo-like kinase 2                                                                            |
| TC15001245.hg.1 | 2.02 | RHOV      | ras homolog family member V                                                                   |
| TC09000526.hg.1 | 2.02 | SMC2      | structural maintenance of chromosomes 2                                                       |
| TC0X001538.hg.1 | 2.02 | G6PD      | glucose-6-phosphate dehydrogenase                                                             |
| TC19000442.hg.1 | 2.02 | GPI       | glucose-6-phosphate isomerase                                                                 |
| TC17002885.hg.1 | 2.02 | P2RX5     | purinergic receptor P2X, ligand-gated ion channel, 5                                          |
| TC14000554.hg.1 | 2.02 | CALM1     | calmodulin 1 (phosphorylase kinase, delta)                                                    |
| TC01004025.hg.1 | 2.01 | FH        | fumarate hydratase                                                                            |
| TC14000433.hg.1 | 2.01 | SIPA1L1   | signal-induced proliferation-associated 1 like 1                                              |
| TC09001001.hg.1 | 2.01 | NDUFB6    | NADH dehydrogenase (ubiquinone) 1 beta subcomplex, 6, 17kDa                                   |
| TC17000600.hg.1 | 2.01 | NSF       | N-ethylmaleimide-sensitive factor                                                             |
| TC17000834.hg.1 | 2.01 | SLC9A3R1  | solute carrier family 9, subfamily A (NHE3, cation proton antiporter 3), member 3 regulator 1 |
| TC19000069.hg.1 | 2.00 | NFIC      | nuclear factor I/C (CCAAT-binding transcription factor)                                       |
| TC0X000730.hg.1 | 2.00 | VMA21     | VMA21 vacuolar H <sup>+</sup> -ATPase homolog (S. cerevisiae)                                 |
| TC06001350.hg.1 | 2.00 | HIST1H2BG | histone cluster 1, H2bg                                                                       |
| TC11000622.hg.1 | 2.00 | POLA2     | polymerase (DNA directed), alpha 2, accessory subunit                                         |

## Supporting References

1. M. J. McKeage, S. J. Berners-Price, P. Galettis, R. J. Bowen, W. Brouwer, L. Ding, L. Zhuang and B. C. Baguley, *Cancer Chemother. Pharmacol.*, 2000, **46**, 343-350.
2. J. Van Houten and R. J. Watts, *J. Am. Chem. Soc.*, 1976, **98**, 4853-4858.
3. D. S. Tyson and F. N. Castellano, *J. Phys. Chem. A*, 1999, **103**, 10955-10960.
4. D. Pucci, A. Bellusci, A. Crispini, M. Ghedini, N. Godbert, E. I. Szerb and A. M. Talarico, *J. Mater. Chem.*, 2009, **19**, 7643-7649.
